# Supplementary material for: Guanidine hydrochloride reactivates an ancient septin hetero-oligomer assembly pathway in budding yeast
Source: eLife. 2020 Jan 28;9:e54355. doi: 10.7554/eLife.54355 (PMC7056273; doi:10.7554/eLife.54355)
Supplement: Figure 1—source data 1. [file elife-54355-fig1-data1.xlsx]

## Sheet: Figure 1E
concentration GdnHCl	0 mM GdnHCl (replicate A)												0 mM GdnHCl (replicate B)												0.375 mM GdnHCl (replicate A)												0.375 mM GdnHCl (replicate B)												0.1875 mM GdnHCl (replicate A)
Replicate	1	2	3	4	5	6	7	8	9	10	11	12	1	2	3	4	5	6	7	8	9	10	11	12	1	2	3	4	5	6	7	8	9	10	11	12	1	2	3	4	5	6	7	8	9	10	11	12	1
t0 min	0.536	0.518	0.511	0.516	0.557	0.536	0.563	0.572	0.561	0.562	0.563	0.577	0.593	0.515	0.505	0.528	0.564	0.584	0.59	0.57	0.569	0.588	0.557	0.604	0.638	0.67	0.685	0.7	0.69	0.665	0.683	0.664	0.685	0.701	0.685	0.663	0.602	0.602	0.631	0.678	0.696	0.692	0.692	0.676	0.692	0.695	0.718	0.715	0.518
t5 min	0.546	0.528	0.521	0.526	0.567	0.546	0.573	0.584	0.572	0.573	0.576	0.591	0.602	0.524	0.515	0.538	0.573	0.594	0.6	0.581	0.58	0.6	0.568	0.614	0.659	0.689	0.706	0.719	0.707	0.683	0.701	0.681	0.704	0.718	0.707	0.686	0.622	0.621	0.644	0.687	0.713	0.702	0.708	0.693	0.711	0.715	0.739	0.736	0.53
t10	0.558	0.538	0.531	0.537	0.58	0.557	0.583	0.594	0.584	0.587	0.586	0.603	0.615	0.534	0.525	0.549	0.583	0.606	0.613	0.592	0.592	0.612	0.579	0.627	0.684	0.711	0.728	0.741	0.727	0.702	0.721	0.701	0.726	0.74	0.729	0.708	0.643	0.642	0.665	0.709	0.733	0.722	0.729	0.712	0.73	0.736	0.761	0.761	0.547
t15	0.568	0.548	0.542	0.547	0.59	0.567	0.595	0.606	0.596	0.599	0.6	0.616	0.627	0.545	0.536	0.56	0.596	0.619	0.626	0.604	0.603	0.626	0.592	0.64	0.703	0.732	0.75	0.763	0.749	0.723	0.743	0.722	0.746	0.763	0.753	0.732	0.664	0.661	0.684	0.73	0.754	0.744	0.75	0.733	0.751	0.758	0.784	0.784	0.562
t20	0.579	0.558	0.552	0.558	0.602	0.58	0.608	0.619	0.607	0.61	0.613	0.627	0.639	0.556	0.548	0.574	0.606	0.631	0.637	0.614	0.617	0.635	0.603	0.652	0.725	0.752	0.773	0.784	0.771	0.745	0.765	0.743	0.766	0.785	0.774	0.756	0.684	0.682	0.705	0.752	0.775	0.765	0.773	0.756	0.772	0.779	0.806	0.809	0.576
t25	0.591	0.57	0.563	0.57	0.614	0.59	0.621	0.63	0.619	0.622	0.624	0.64	0.651	0.567	0.557	0.585	0.618	0.643	0.648	0.627	0.628	0.648	0.616	0.664	0.748	0.775	0.792	0.803	0.794	0.764	0.785	0.762	0.789	0.807	0.797	0.781	0.705	0.704	0.727	0.773	0.795	0.783	0.795	0.776	0.796	0.803	0.829	0.833	0.592
t30	0.603	0.581	0.575	0.583	0.627	0.603	0.63	0.644	0.632	0.634	0.637	0.653	0.664	0.579	0.568	0.596	0.631	0.656	0.662	0.639	0.64	0.662	0.627	0.679	0.771	0.795	0.814	0.825	0.814	0.785	0.806	0.784	0.811	0.828	0.819	0.803	0.728	0.727	0.749	0.793	0.818	0.803	0.814	0.794	0.816	0.824	0.851	0.854	0.608
t35	0.615	0.593	0.587	0.592	0.637	0.614	0.642	0.656	0.642	0.646	0.649	0.667	0.676	0.591	0.578	0.609	0.642	0.667	0.674	0.652	0.653	0.673	0.638	0.689	0.79	0.813	0.833	0.846	0.834	0.806	0.828	0.802	0.831	0.851	0.839	0.823	0.744	0.744	0.767	0.816	0.835	0.824	0.835	0.815	0.838	0.845	0.872	0.874	0.622
t40	0.627	0.603	0.597	0.602	0.647	0.626	0.655	0.665	0.653	0.659	0.66	0.677	0.688	0.602	0.589	0.619	0.654	0.68	0.686	0.663	0.665	0.684	0.649	0.703	0.808	0.835	0.852	0.867	0.852	0.825	0.846	0.822	0.852	0.868	0.86	0.841	0.763	0.762	0.784	0.836	0.856	0.844	0.853	0.835	0.856	0.865	0.89	0.895	0.636
t45	0.637	0.613	0.606	0.611	0.658	0.635	0.664	0.676	0.664	0.668	0.671	0.689	0.698	0.612	0.599	0.628	0.664	0.692	0.697	0.673	0.674	0.695	0.66	0.716	0.825	0.851	0.871	0.884	0.873	0.843	0.865	0.839	0.871	0.889	0.88	0.86	0.782	0.78	0.804	0.853	0.877	0.862	0.873	0.852	0.876	0.882	0.909	0.914	0.648
t50	0.645	0.623	0.615	0.62	0.669	0.644	0.673	0.686	0.673	0.676	0.682	0.7	0.708	0.621	0.608	0.637	0.674	0.701	0.707	0.682	0.683	0.706	0.671	0.727	0.844	0.871	0.888	0.902	0.891	0.86	0.881	0.856	0.887	0.905	0.897	0.877	0.8	0.797	0.822	0.873	0.894	0.879	0.892	0.872	0.896	0.9	0.927	0.933	0.663
t55	0.656	0.632	0.625	0.631	0.677	0.654	0.681	0.694	0.682	0.685	0.691	0.709	0.719	0.63	0.618	0.647	0.684	0.711	0.716	0.691	0.694	0.716	0.681	0.737	0.866	0.889	0.907	0.921	0.906	0.879	0.901	0.875	0.903	0.922	0.917	0.896	0.82	0.816	0.842	0.89	0.909	0.895	0.908	0.89	0.913	0.919	0.948	0.95	0.677
t60	0.666	0.639	0.633	0.638	0.686	0.66	0.689	0.703	0.692	0.695	0.701	0.72	0.728	0.638	0.627	0.654	0.692	0.719	0.727	0.701	0.703	0.725	0.688	0.747	0.881	0.906	0.923	0.937	0.924	0.894	0.917	0.892	0.921	0.943	0.933	0.914	0.838	0.833	0.855	0.907	0.926	0.912	0.926	0.905	0.929	0.935	0.963	0.965	0.688
t65	0.674	0.651	0.64	0.646	0.694	0.671	0.697	0.712	0.701	0.702	0.708	0.728	0.738	0.647	0.633	0.662	0.701	0.727	0.734	0.708	0.712	0.735	0.695	0.757	0.902	0.924	0.943	0.954	0.94	0.912	0.933	0.908	0.94	0.958	0.95	0.931	0.856	0.849	0.873	0.924	0.944	0.928	0.941	0.922	0.946	0.953	0.982	0.984	0.7
t70	0.681	0.656	0.648	0.656	0.702	0.678	0.707	0.72	0.708	0.711	0.718	0.738	0.746	0.654	0.641	0.669	0.708	0.733	0.743	0.715	0.719	0.742	0.704	0.765	0.921	0.941	0.961	0.97	0.957	0.928	0.947	0.925	0.956	0.975	0.968	0.947	0.872	0.864	0.889	0.942	0.961	0.946	0.958	0.938	0.962	0.969	0.999	1.002	0.712
t75	0.69	0.663	0.655	0.662	0.709	0.683	0.714	0.728	0.717	0.719	0.726	0.746	0.755	0.663	0.647	0.677	0.715	0.744	0.75	0.725	0.728	0.752	0.714	0.775	0.94	0.959	0.978	0.987	0.973	0.946	0.966	0.941	0.974	0.992	0.987	0.97	0.889	0.883	0.907	0.959	0.976	0.961	0.973	0.955	0.979	0.989	1.016	1.02	0.723
t80	0.699	0.672	0.663	0.67	0.716	0.692	0.72	0.735	0.724	0.725	0.732	0.753	0.762	0.67	0.654	0.685	0.724	0.752	0.757	0.732	0.734	0.757	0.72	0.782	0.955	0.973	0.993	1.004	0.989	0.964	0.982	0.959	0.989	1.007	1.002	0.985	0.906	0.9	0.922	0.974	0.993	0.978	0.991	0.972	0.997	1.004	1.033	1.035	0.735
t85	0.707	0.679	0.671	0.678	0.723	0.697	0.728	0.742	0.729	0.733	0.74	0.761	0.77	0.676	0.66	0.692	0.732	0.757	0.764	0.739	0.741	0.764	0.727	0.788	0.971	0.99	1.009	1.018	1.005	0.979	0.999	0.975	1.006	1.027	1.018	1	0.923	0.917	0.939	0.993	1.008	0.995	1.006	0.987	1.012	1.017	1.049	1.054	0.746
t90	0.712	0.686	0.677	0.681	0.729	0.703	0.736	0.746	0.736	0.742	0.747	0.769	0.777	0.684	0.668	0.697	0.738	0.764	0.77	0.744	0.747	0.771	0.734	0.797	0.99	1.008	1.024	1.035	1.019	0.994	1.016	0.991	1.023	1.041	1.035	1.018	0.94	0.934	0.956	1.008	1.027	1.01	1.021	1.003	1.029	1.035	1.065	1.071	0.756
t95	0.721	0.692	0.683	0.688	0.736	0.712	0.741	0.754	0.743	0.745	0.754	0.777	0.784	0.689	0.675	0.704	0.745	0.772	0.777	0.751	0.753	0.777	0.739	0.802	1.009	1.024	1.042	1.052	1.037	1.011	1.031	1.006	1.036	1.057	1.052	1.034	0.956	0.949	0.97	1.024	1.042	1.026	1.038	1.02	1.043	1.05	1.082	1.086	0.767
t100	0.728	0.7	0.69	0.695	0.743	0.716	0.748	0.762	0.747	0.753	0.761	0.785	0.79	0.697	0.679	0.71	0.749	0.777	0.781	0.757	0.759	0.783	0.745	0.809	1.026	1.04	1.058	1.066	1.052	1.025	1.046	1.021	1.053	1.073	1.069	1.053	0.973	0.966	0.988	1.04	1.056	1.04	1.054	1.037	1.06	1.066	1.098	1.102	0.779
t105	0.734	0.706	0.694	0.701	0.748	0.721	0.753	0.769	0.755	0.759	0.768	0.792	0.798	0.703	0.685	0.716	0.755	0.784	0.786	0.766	0.765	0.79	0.751	0.814	1.043	1.058	1.073	1.085	1.069	1.041	1.062	1.037	1.07	1.089	1.084	1.069	0.991	0.982	1.004	1.057	1.073	1.055	1.068	1.052	1.075	1.083	1.114	1.118	0.79
t110	0.741	0.712	0.702	0.708	0.755	0.728	0.758	0.774	0.759	0.765	0.775	0.797	0.804	0.709	0.691	0.722	0.762	0.79	0.793	0.769	0.771	0.795	0.755	0.821	1.058	1.074	1.087	1.098	1.083	1.057	1.076	1.052	1.084	1.103	1.101	1.086	1.006	0.998	1.022	1.071	1.087	1.071	1.084	1.069	1.089	1.098	1.13	1.133	0.801
t115	0.747	0.718	0.709	0.713	0.761	0.732	0.763	0.779	0.766	0.771	0.779	0.803	0.813	0.714	0.697	0.726	0.766	0.795	0.799	0.774	0.778	0.801	0.761	0.827	1.077	1.088	1.104	1.116	1.098	1.07	1.09	1.068	1.101	1.121	1.118	1.101	1.024	1.015	1.038	1.086	1.101	1.085	1.1	1.082	1.105	1.113	1.146	1.148	0.812
t120	0.752	0.722	0.713	0.717	0.766	0.737	0.77	0.784	0.769	0.775	0.786	0.811	0.818	0.72	0.701	0.73	0.773	0.799	0.803	0.779	0.782	0.807	0.767	0.834	1.092	1.105	1.119	1.129	1.114	1.087	1.107	1.081	1.117	1.135	1.133	1.117	1.04	1.031	1.052	1.102	1.118	1.101	1.114	1.098	1.12	1.131	1.162	1.166	0.823
t125	0.758	0.729	0.718	0.724	0.771	0.741	0.776	0.786	0.775	0.78	0.791	0.817	0.823	0.726	0.707	0.734	0.777	0.803	0.806	0.783	0.787	0.812	0.773	0.838	1.11	1.121	1.137	1.144	1.128	1.102	1.122	1.096	1.131	1.15	1.15	1.133	1.058	1.049	1.069	1.118	1.133	1.115	1.13	1.114	1.137	1.143	1.175	1.18	0.833
t130	0.764	0.734	0.722	0.727	0.775	0.744	0.778	0.793	0.781	0.782	0.795	0.82	0.829	0.731	0.712	0.739	0.781	0.808	0.811	0.788	0.792	0.814	0.776	0.842	1.126	1.137	1.153	1.161	1.145	1.119	1.137	1.113	1.147	1.164	1.163	1.151	1.073	1.064	1.083	1.134	1.149	1.129	1.143	1.128	1.15	1.158	1.194	1.196	0.84
t135	0.769	0.739	0.726	0.731	0.78	0.749	0.783	0.797	0.784	0.787	0.8	0.826	0.833	0.736	0.716	0.743	0.786	0.81	0.816	0.791	0.796	0.82	0.78	0.848	1.144	1.154	1.167	1.174	1.159	1.134	1.151	1.127	1.161	1.18	1.182	1.169	1.091	1.079	1.1	1.147	1.163	1.144	1.158	1.145	1.165	1.173	1.208	1.212	0.849
t140	0.774	0.743	0.73	0.734	0.782	0.753	0.788	0.801	0.787	0.79	0.804	0.83	0.838	0.74	0.719	0.746	0.788	0.816	0.82	0.795	0.8	0.821	0.784	0.853	1.161	1.172	1.183	1.189	1.174	1.149	1.169	1.142	1.176	1.193	1.197	1.184	1.107	1.096	1.116	1.163	1.177	1.158	1.172	1.161	1.183	1.189	1.222	1.229	0.859
t145	0.779	0.747	0.734	0.738	0.786	0.756	0.79	0.805	0.791	0.794	0.807	0.835	0.841	0.742	0.723	0.749	0.793	0.819	0.822	0.797	0.802	0.825	0.787	0.856	1.176	1.185	1.196	1.202	1.189	1.163	1.183	1.156	1.191	1.21	1.212	1.199	1.124	1.113	1.131	1.178	1.192	1.173	1.188	1.174	1.197	1.204	1.238	1.242	0.866
t150	0.783	0.749	0.737	0.741	0.789	0.759	0.791	0.808	0.793	0.797	0.813	0.839	0.845	0.747	0.727	0.754	0.794	0.821	0.824	0.798	0.805	0.829	0.79	0.86	1.192	1.2	1.214	1.218	1.204	1.177	1.196	1.171	1.205	1.222	1.226	1.213	1.138	1.127	1.147	1.192	1.206	1.188	1.201	1.188	1.21	1.22	1.254	1.259	0.873
t155	0.786	0.753	0.74	0.745	0.791	0.761	0.795	0.81	0.796	0.8	0.816	0.843	0.849	0.75	0.73	0.754	0.797	0.824	0.826	0.801	0.807	0.83	0.793	0.864	1.209	1.216	1.228	1.231	1.217	1.192	1.211	1.186	1.22	1.238	1.241	1.229	1.155	1.143	1.161	1.208	1.22	1.2	1.214	1.201	1.225	1.234	1.267	1.274	0.883
t160	0.791	0.756	0.744	0.748	0.795	0.764	0.797	0.814	0.798	0.801	0.82	0.845	0.853	0.754	0.733	0.757	0.796	0.826	0.828	0.804	0.809	0.832	0.795	0.866	1.225	1.231	1.243	1.246	1.232	1.204	1.224	1.198	1.234	1.251	1.257	1.244	1.171	1.158	1.178	1.221	1.233	1.215	1.228	1.217	1.24	1.246	1.284	1.287	0.89
t165	0.794	0.758	0.746	0.75	0.795	0.765	0.799	0.816	0.799	0.803	0.821	0.847	0.858	0.757	0.735	0.76	0.799	0.827	0.829	0.805	0.811	0.833	0.796	0.869	1.24	1.245	1.254	1.26	1.245	1.221	1.24	1.213	1.249	1.265	1.271	1.259	1.187	1.172	1.191	1.238	1.246	1.228	1.242	1.228	1.252	1.263	1.297	1.302	0.897
t170	0.796	0.76	0.749	0.75	0.795	0.766	0.802	0.817	0.802	0.806	0.822	0.849	0.859	0.759	0.74	0.761	0.801	0.83	0.834	0.807	0.812	0.834	0.799	0.869	1.256	1.26	1.27	1.274	1.259	1.232	1.254	1.227	1.262	1.28	1.283	1.273	1.2	1.189	1.206	1.252	1.261	1.241	1.256	1.243	1.266	1.276	1.312	1.315	0.904
t175	0.8	0.764	0.75	0.752	0.797	0.768	0.804	0.82	0.804	0.809	0.825	0.853	0.86	0.761	0.74	0.762	0.802	0.83	0.833	0.81	0.813	0.835	0.799	0.873	1.27	1.276	1.285	1.288	1.272	1.248	1.267	1.242	1.277	1.294	1.298	1.289	1.217	1.203	1.22	1.265	1.273	1.256	1.268	1.257	1.282	1.289	1.325	1.331	0.909
t180	0.803	0.767	0.751	0.753	0.797	0.769	0.804	0.821	0.805	0.809	0.828	0.856	0.864	0.764	0.741	0.762	0.803	0.833	0.833	0.809	0.814	0.838	0.802	0.874	1.285	1.288	1.297	1.301	1.284	1.261	1.279	1.254	1.289	1.307	1.31	1.302	1.231	1.217	1.234	1.279	1.287	1.267	1.282	1.271	1.295	1.302	1.339	1.345	0.916
t185	0.805	0.768	0.753	0.755	0.799	0.77	0.805	0.819	0.806	0.81	0.829	0.856	0.867	0.764	0.743	0.762	0.804	0.832	0.834	0.811	0.815	0.838	0.804	0.877	1.301	1.303	1.311	1.313	1.297	1.272	1.29	1.268	1.305	1.322	1.325	1.317	1.246	1.234	1.249	1.291	1.299	1.279	1.295	1.285	1.307	1.316	1.354	1.356	0.921
t190	0.807	0.769	0.755	0.756	0.8	0.77	0.807	0.82	0.807	0.81	0.829	0.858	0.869	0.765	0.743	0.764	0.803	0.833	0.833	0.81	0.818	0.841	0.804	0.878	1.315	1.317	1.326	1.327	1.31	1.286	1.303	1.281	1.316	1.333	1.338	1.331	1.26	1.248	1.262	1.305	1.312	1.292	1.308	1.298	1.32	1.328	1.364	1.369	0.927
t195	0.809	0.77	0.754	0.756	0.801	0.77	0.806	0.82	0.807	0.813	0.832	0.861	0.869	0.767	0.746	0.764	0.804	0.834	0.834	0.811	0.817	0.84	0.803	0.877	1.332	1.331	1.337	1.338	1.323	1.298	1.318	1.295	1.328	1.345	1.351	1.343	1.274	1.263	1.276	1.319	1.325	1.305	1.321	1.31	1.334	1.339	1.377	1.383	0.932
t200	0.811	0.771	0.758	0.756	0.801	0.77	0.807	0.82	0.808	0.814	0.832	0.861	0.871	0.769	0.747	0.766	0.805	0.834	0.836	0.811	0.817	0.84	0.803	0.877	1.345	1.344	1.35	1.352	1.334	1.31	1.33	1.306	1.343	1.357	1.366	1.359	1.29	1.275	1.289	1.332	1.336	1.314	1.333	1.321	1.346	1.351	1.39	1.395	0.938
t205	0.811	0.773	0.758	0.756	0.801	0.77	0.805	0.819	0.807	0.813	0.834	0.861	0.871	0.77	0.746	0.763	0.805	0.834	0.835	0.811	0.818	0.838	0.804	0.877	1.357	1.357	1.362	1.365	1.346	1.323	1.341	1.318	1.354	1.37	1.378	1.373	1.305	1.291	1.303	1.345	1.347	1.327	1.346	1.335	1.359	1.363	1.402	1.41	0.941
t210	0.815	0.773	0.759	0.757	0.801	0.77	0.805	0.817	0.806	0.813	0.833	0.862	0.872	0.77	0.746	0.764	0.805	0.834	0.832	0.809	0.818	0.841	0.804	0.878	1.373	1.371	1.376	1.375	1.358	1.337	1.354	1.332	1.368	1.381	1.39	1.385	1.319	1.304	1.315	1.357	1.361	1.339	1.357	1.346	1.371	1.376	1.414	1.421	0.946
t215	0.816	0.774	0.759	0.755	0.799	0.771	0.805	0.818	0.804	0.813	0.832	0.862	0.873	0.772	0.745	0.764	0.804	0.835	0.831	0.809	0.818	0.84	0.803	0.879	1.387	1.384	1.388	1.388	1.37	1.347	1.364	1.343	1.38	1.395	1.404	1.396	1.333	1.316	1.329	1.368	1.373	1.35	1.369	1.358	1.384	1.389	1.426	1.434	0.949
t220	0.816	0.774	0.759	0.755	0.798	0.767	0.803	0.818	0.805	0.813	0.833	0.862	0.875	0.772	0.746	0.763	0.802	0.832	0.83	0.808	0.817	0.837	0.802	0.879	1.399	1.397	1.401	1.4	1.382	1.36	1.379	1.354	1.391	1.406	1.417	1.409	1.347	1.332	1.342	1.38	1.384	1.361	1.381	1.37	1.395	1.4	1.439	1.446	0.951
t225	0.815	0.775	0.759	0.754	0.799	0.769	0.803	0.818	0.806	0.816	0.834	0.863	0.877	0.771	0.746	0.762	0.8	0.831	0.831	0.808	0.817	0.839	0.803	0.879	1.415	1.41	1.412	1.411	1.392	1.374	1.39	1.366	1.404	1.419	1.431	1.424	1.36	1.345	1.355	1.393	1.395	1.372	1.391	1.382	1.409	1.413	1.453	1.457	0.955
t230	0.817	0.775	0.76	0.755	0.8	0.768	0.803	0.816	0.804	0.812	0.832	0.861	0.877	0.772	0.745	0.761	0.801	0.83	0.83	0.807	0.815	0.835	0.801	0.877	1.427	1.422	1.425	1.423	1.403	1.383	1.4	1.379	1.415	1.43	1.44	1.435	1.374	1.358	1.367	1.404	1.407	1.383	1.403	1.393	1.419	1.424	1.462	1.469	0.957
t235	0.817	0.777	0.76	0.755	0.799	0.767	0.8	0.815	0.804	0.812	0.833	0.861	0.878	0.773	0.745	0.761	0.802	0.831	0.828	0.805	0.814	0.836	0.8	0.876	1.44	1.434	1.436	1.435	1.415	1.395	1.412	1.39	1.426	1.44	1.453	1.446	1.388	1.369	1.378	1.417	1.418	1.392	1.415	1.405	1.43	1.434	1.472	1.481	0.959
t240	0.815	0.776	0.76	0.754	0.798	0.766	0.8	0.814	0.804	0.811	0.833	0.862	0.877	0.772	0.744	0.761	0.799	0.829	0.828	0.806	0.814	0.836	0.801	0.877	1.454	1.446	1.448	1.445	1.425	1.406	1.424	1.401	1.438	1.451	1.466	1.459	1.398	1.383	1.389	1.427	1.428	1.405	1.426	1.417	1.441	1.447	1.485	1.493	0.961
t245	0.816	0.775	0.761	0.752	0.796	0.765	0.798	0.813	0.803	0.809	0.832	0.86	0.876	0.771	0.742	0.757	0.798	0.827	0.826	0.802	0.812	0.835	0.798	0.876	1.466	1.456	1.458	1.456	1.437	1.415	1.435	1.412	1.448	1.462	1.475	1.47	1.412	1.395	1.404	1.438	1.44	1.415	1.437	1.427	1.452	1.457	1.495	1.502	0.964
t250	0.818	0.776	0.761	0.751	0.796	0.764	0.798	0.81	0.801	0.809	0.832	0.86	0.875	0.772	0.742	0.758	0.797	0.826	0.824	0.802	0.811	0.832	0.797	0.875	1.478	1.468	1.469	1.465	1.447	1.426	1.444	1.423	1.458	1.474	1.486	1.48	1.424	1.407	1.414	1.448	1.448	1.427	1.446	1.436	1.464	1.469	1.505	1.514	0.965
t255	0.817	0.775	0.76	0.75	0.794	0.763	0.795	0.809	0.8	0.808	0.831	0.859	0.876	0.772	0.741	0.757	0.795	0.823	0.822	0.8	0.81	0.829	0.796	0.873	1.489	1.479	1.48	1.475	1.458	1.438	1.455	1.433	1.468	1.484	1.498	1.492	1.437	1.419	1.426	1.458	1.46	1.437	1.457	1.448	1.472	1.476	1.514	1.524	0.968
t260	0.817	0.773	0.759	0.748	0.794	0.761	0.794	0.807	0.8	0.807	0.83	0.858	0.875	0.771	0.741	0.756	0.794	0.822	0.821	0.799	0.808	0.83	0.795	0.872	1.5	1.488	1.491	1.487	1.467	1.447	1.466	1.445	1.479	1.494	1.508	1.503	1.447	1.43	1.437	1.47	1.469	1.443	1.466	1.458	1.483	1.488	1.526	1.533	0.968
t265	0.816	0.772	0.759	0.748	0.794	0.76	0.794	0.807	0.798	0.805	0.828	0.859	0.875	0.77	0.739	0.755	0.792	0.822	0.819	0.798	0.806	0.828	0.793	0.871	1.512	1.499	1.5	1.496	1.477	1.458	1.475	1.455	1.489	1.504	1.516	1.513	1.458	1.444	1.448	1.478	1.477	1.454	1.477	1.468	1.492	1.498	1.535	1.542	0.97
t270	0.817	0.773	0.758	0.748	0.793	0.759	0.792	0.806	0.798	0.803	0.827	0.857	0.875	0.77	0.738	0.754	0.79	0.821	0.818	0.797	0.804	0.827	0.792	0.87	1.523	1.51	1.51	1.505	1.487	1.467	1.485	1.465	1.497	1.514	1.527	1.524	1.47	1.454	1.457	1.487	1.487	1.464	1.485	1.478	1.502	1.506	1.545	1.552	0.972
t275	0.816	0.772	0.757	0.746	0.79	0.758	0.791	0.804	0.795	0.803	0.825	0.857	0.873	0.769	0.737	0.751	0.791	0.82	0.817	0.795	0.802	0.825	0.791	0.87	1.532	1.518	1.519	1.514	1.496	1.477	1.495	1.474	1.507	1.523	1.538	1.533	1.483	1.465	1.468	1.497	1.497	1.472	1.495	1.489	1.511	1.517	1.554	1.561	0.972
t280	0.817	0.771	0.755	0.745	0.788	0.756	0.789	0.802	0.794	0.8	0.824	0.856	0.873	0.768	0.735	0.752	0.789	0.817	0.815	0.792	0.801	0.824	0.79	0.87	1.542	1.529	1.529	1.522	1.504	1.486	1.504	1.484	1.516	1.531	1.547	1.543	1.492	1.476	1.478	1.508	1.507	1.481	1.505	1.497	1.519	1.526	1.564	1.57	0.973
t285	0.817	0.77	0.755	0.745	0.789	0.754	0.789	0.801	0.793	0.799	0.821	0.854	0.872	0.768	0.735	0.751	0.788	0.816	0.814	0.791	0.8	0.823	0.79	0.868	1.552	1.539	1.537	1.532	1.515	1.495	1.512	1.491	1.525	1.54	1.556	1.552	1.504	1.488	1.489	1.516	1.515	1.489	1.513	1.505	1.529	1.535	1.573	1.579	0.974
t290	0.816	0.769	0.755	0.743	0.786	0.754	0.787	0.798	0.792	0.797	0.82	0.853	0.872	0.766	0.733	0.749	0.787	0.816	0.813	0.789	0.798	0.823	0.788	0.867	1.562	1.546	1.546	1.54	1.523	1.503	1.522	1.501	1.535	1.549	1.564	1.562	1.514	1.497	1.498	1.524	1.523	1.499	1.522	1.517	1.537	1.542	1.581	1.589	0.976
t295	0.814	0.769	0.752	0.742	0.784	0.75	0.784	0.798	0.791	0.797	0.819	0.853	0.87	0.765	0.733	0.748	0.784	0.814	0.811	0.789	0.796	0.821	0.788	0.866	1.571	1.555	1.553	1.548	1.531	1.513	1.529	1.51	1.543	1.558	1.573	1.571	1.522	1.507	1.506	1.533	1.53	1.507	1.531	1.525	1.547	1.552	1.588	1.595	0.974
t300	0.813	0.767	0.752	0.74	0.783	0.75	0.784	0.797	0.789	0.795	0.818	0.85	0.868	0.763	0.731	0.747	0.783	0.812	0.81	0.787	0.795	0.82	0.787	0.863	1.579	1.564	1.562	1.555	1.539	1.521	1.538	1.519	1.552	1.566	1.58	1.58	1.531	1.517	1.516	1.541	1.538	1.511	1.538	1.533	1.554	1.56	1.597	1.604	0.976
t305	0.814	0.766	0.751	0.738	0.782	0.748	0.782	0.794	0.787	0.795	0.816	0.849	0.866	0.762	0.73	0.744	0.782	0.81	0.809	0.786	0.793	0.818	0.785	0.863	1.587	1.572	1.57	1.563	1.547	1.528	1.544	1.527	1.559	1.573	1.589	1.588	1.541	1.525	1.524	1.549	1.545	1.518	1.546	1.54	1.561	1.567	1.603	1.612	0.976
t310	0.813	0.765	0.751	0.738	0.78	0.747	0.781	0.793	0.786	0.793	0.815	0.848	0.865	0.761	0.729	0.744	0.78	0.808	0.807	0.785	0.792	0.816	0.783	0.861	1.595	1.581	1.577	1.571	1.555	1.537	1.552	1.535	1.566	1.581	1.596	1.596	1.549	1.534	1.534	1.557	1.554	1.526	1.553	1.547	1.569	1.574	1.61	1.619	0.976
t315	0.81	0.764	0.75	0.736	0.778	0.746	0.777	0.792	0.785	0.793	0.815	0.848	0.866	0.761	0.728	0.741	0.779	0.805	0.804	0.782	0.792	0.814	0.783	0.86	1.603	1.587	1.585	1.579	1.562	1.544	1.56	1.543	1.573	1.589	1.605	1.604	1.558	1.543	1.542	1.565	1.561	1.533	1.562	1.555	1.576	1.581	1.618	1.626	0.977
t320	0.81	0.764	0.749	0.735	0.777	0.745	0.778	0.79	0.783	0.791	0.814	0.844	0.864	0.76	0.728	0.741	0.78	0.805	0.803	0.78	0.79	0.813	0.781	0.858	1.61	1.594	1.592	1.584	1.569	1.552	1.567	1.551	1.579	1.595	1.613	1.612	1.565	1.551	1.55	1.573	1.567	1.539	1.568	1.562	1.584	1.588	1.625	1.633	0.977
t325	0.809	0.762	0.749	0.734	0.776	0.742	0.776	0.789	0.783	0.788	0.811	0.843	0.863	0.759	0.725	0.739	0.776	0.803	0.801	0.778	0.788	0.81	0.779	0.855	1.617	1.602	1.599	1.591	1.576	1.559	1.574	1.559	1.588	1.602	1.62	1.619	1.574	1.561	1.557	1.579	1.574	1.546	1.574	1.569	1.59	1.596	1.631	1.639	0.978
t330	0.808	0.761	0.747	0.733	0.775	0.741	0.774	0.787	0.782	0.787	0.81	0.842	0.862	0.757	0.724	0.739	0.776	0.802	0.799	0.777	0.787	0.809	0.777	0.853	1.624	1.608	1.607	1.598	1.581	1.566	1.581	1.565	1.594	1.61	1.626	1.627	1.582	1.568	1.565	1.586	1.58	1.553	1.58	1.574	1.597	1.601	1.637	1.646	0.978
t335	0.807	0.76	0.746	0.731	0.773	0.739	0.772	0.785	0.78	0.786	0.809	0.842	0.86	0.757	0.724	0.737	0.774	0.799	0.798	0.775	0.786	0.809	0.776	0.854	1.63	1.614	1.612	1.605	1.589	1.573	1.588	1.571	1.6	1.616	1.632	1.633	1.589	1.575	1.572	1.592	1.587	1.558	1.588	1.58	1.603	1.609	1.645	1.652	0.977
t340	0.808	0.759	0.745	0.731	0.772	0.738	0.771	0.784	0.779	0.784	0.808	0.842	0.861	0.755	0.723	0.736	0.773	0.799	0.796	0.775	0.785	0.806	0.774	0.852	1.637	1.621	1.619	1.611	1.596	1.579	1.594	1.58	1.607	1.621	1.64	1.639	1.596	1.583	1.58	1.599	1.594	1.564	1.595	1.587	1.61	1.615	1.651	1.658	0.978
t345	0.806	0.758	0.744	0.729	0.771	0.738	0.77	0.782	0.777	0.782	0.805	0.84	0.859	0.755	0.722	0.737	0.77	0.797	0.795	0.773	0.784	0.806	0.775	0.851	1.643	1.627	1.625	1.615	1.601	1.585	1.599	1.585	1.614	1.628	1.645	1.645	1.603	1.592	1.588	1.606	1.6	1.572	1.598	1.594	1.615	1.622	1.657	1.664	0.976
t350	0.805	0.757	0.743	0.729	0.771	0.736	0.769	0.781	0.775	0.78	0.804	0.838	0.858	0.753	0.721	0.732	0.77	0.796	0.794	0.772	0.781	0.805	0.773	0.849	1.648	1.632	1.631	1.621	1.607	1.591	1.606	1.591	1.62	1.633	1.651	1.651	1.61	1.598	1.594	1.612	1.606	1.576	1.605	1.6	1.621	1.628	1.661	1.67	0.976
t355	0.803	0.755	0.742	0.727	0.769	0.734	0.768	0.781	0.774	0.78	0.803	0.839	0.856	0.752	0.72	0.732	0.768	0.794	0.792	0.77	0.781	0.804	0.771	0.849	1.654	1.638	1.637	1.626	1.614	1.599	1.612	1.598	1.625	1.639	1.657	1.657	1.617	1.605	1.6	1.619	1.613	1.582	1.611	1.606	1.627	1.634	1.667	1.676	0.976
t360	0.803	0.754	0.74	0.726	0.768	0.733	0.767	0.779	0.773	0.778	0.8	0.835	0.856	0.751	0.719	0.73	0.765	0.791	0.791	0.769	0.78	0.802	0.77	0.847	1.659	1.643	1.642	1.632	1.62	1.603	1.619	1.603	1.63	1.644	1.663	1.662	1.623	1.611	1.607	1.624	1.617	1.587	1.617	1.611	1.632	1.639	1.672	1.68	0.976
t365	0.801	0.754	0.739	0.724	0.765	0.732	0.765	0.777	0.772	0.778	0.799	0.834	0.854	0.75	0.717	0.729	0.765	0.791	0.79	0.769	0.779	0.802	0.768	0.846	1.665	1.648	1.647	1.638	1.625	1.61	1.622	1.608	1.637	1.65	1.669	1.668	1.629	1.618	1.613	1.631	1.624	1.594	1.622	1.616	1.637	1.644	1.677	1.685	0.976
t370	0.801	0.754	0.738	0.724	0.764	0.73	0.763	0.776	0.77	0.776	0.798	0.833	0.854	0.748	0.716	0.728	0.765	0.79	0.79	0.768	0.777	0.799	0.767	0.846	1.67	1.655	1.653	1.644	1.632	1.617	1.629	1.613	1.642	1.655	1.674	1.673	1.635	1.625	1.62	1.637	1.628	1.6	1.627	1.623	1.643	1.65	1.684	1.689	0.976
t375	0.799	0.752	0.735	0.723	0.762	0.73	0.763	0.776	0.769	0.776	0.796	0.832	0.852	0.747	0.715	0.727	0.762	0.789	0.787	0.767	0.776	0.8	0.767	0.844	1.675	1.657	1.656	1.646	1.635	1.619	1.634	1.622	1.647	1.661	1.679	1.678	1.64	1.63	1.624	1.641	1.633	1.602	1.633	1.629	1.648	1.654	1.688	1.694	0.976
t380	0.798	0.752	0.734	0.721	0.762	0.729	0.762	0.775	0.769	0.774	0.795	0.832	0.852	0.746	0.714	0.726	0.762	0.785	0.786	0.766	0.775	0.799	0.766	0.843	1.681	1.663	1.662	1.652	1.64	1.625	1.639	1.627	1.652	1.666	1.685	1.684	1.646	1.637	1.63	1.646	1.638	1.608	1.636	1.633	1.654	1.659	1.691	1.699	0.976
t385	0.797	0.751	0.734	0.721	0.76	0.728	0.762	0.773	0.767	0.772	0.794	0.831	0.85	0.744	0.712	0.724	0.761	0.786	0.785	0.763	0.772	0.796	0.765	0.843	1.685	1.667	1.666	1.656	1.645	1.629	1.644	1.632	1.658	1.671	1.69	1.689	1.65	1.642	1.636	1.651	1.643	1.613	1.642	1.638	1.659	1.663	1.697	1.704	0.975
t390	0.797	0.751	0.732	0.72	0.758	0.727	0.76	0.772	0.765	0.771	0.793	0.829	0.849	0.744	0.711	0.723	0.76	0.785	0.784	0.762	0.771	0.795	0.764	0.843	1.69	1.671	1.671	1.661	1.65	1.635	1.649	1.636	1.66	1.675	1.694	1.693	1.655	1.648	1.64	1.656	1.648	1.617	1.648	1.644	1.663	1.668	1.701	1.709	0.975
t395	0.795	0.749	0.733	0.719	0.757	0.726	0.758	0.771	0.765	0.772	0.793	0.828	0.847	0.743	0.71	0.722	0.759	0.782	0.783	0.762	0.77	0.794	0.763	0.841	1.694	1.676	1.675	1.666	1.655	1.641	1.653	1.641	1.666	1.679	1.699	1.698	1.661	1.652	1.646	1.661	1.653	1.623	1.652	1.647	1.667	1.672	1.705	1.713	0.974
t400	0.793	0.749	0.731	0.718	0.756	0.726	0.758	0.769	0.764	0.771	0.791	0.827	0.846	0.742	0.709	0.721	0.758	0.781	0.782	0.762	0.768	0.791	0.761	0.84	1.697	1.68	1.68	1.672	1.659	1.646	1.659	1.646	1.671	1.684	1.702	1.702	1.665	1.658	1.651	1.666	1.659	1.627	1.657	1.653	1.672	1.677	1.71	1.718	0.973
t405	0.793	0.748	0.731	0.716	0.755	0.725	0.757	0.768	0.762	0.768	0.789	0.825	0.846	0.74	0.708	0.721	0.756	0.78	0.779	0.76	0.769	0.791	0.762	0.839	1.702	1.684	1.684	1.675	1.663	1.651	1.663	1.651	1.676	1.688	1.708	1.706	1.67	1.663	1.656	1.669	1.662	1.631	1.66	1.657	1.677	1.681	1.714	1.721	0.973
t410	0.792	0.748	0.729	0.717	0.754	0.724	0.755	0.767	0.761	0.767	0.788	0.823	0.845	0.74	0.707	0.72	0.754	0.779	0.78	0.758	0.767	0.791	0.761	0.838	1.705	1.688	1.688	1.678	1.666	1.655	1.667	1.656	1.681	1.693	1.712	1.71	1.674	1.667	1.66	1.674	1.665	1.635	1.665	1.663	1.682	1.686	1.717	1.726	0.973
t415	0.79	0.747	0.729	0.716	0.752	0.723	0.754	0.766	0.76	0.766	0.788	0.823	0.843	0.739	0.707	0.718	0.753	0.778	0.777	0.757	0.767	0.789	0.76	0.837	1.709	1.692	1.691	1.682	1.672	1.66	1.671	1.661	1.684	1.697	1.715	1.714	1.679	1.672	1.664	1.679	1.671	1.64	1.67	1.666	1.684	1.69	1.722	1.728	0.973
t420	0.789	0.745	0.728	0.716	0.75	0.722	0.753	0.765	0.759	0.766	0.786	0.822	0.841	0.739	0.705	0.716	0.753	0.777	0.776	0.756	0.766	0.788	0.759	0.835	1.712	1.695	1.695	1.685	1.675	1.663	1.676	1.665	1.689	1.7	1.72	1.717	1.683	1.677	1.669	1.683	1.675	1.644	1.674	1.671	1.689	1.693	1.725	1.732	0.972
t425	0.789	0.745	0.727	0.715	0.75	0.721	0.753	0.763	0.758	0.764	0.785	0.82	0.84	0.736	0.705	0.716	0.753	0.776	0.775	0.755	0.764	0.788	0.757	0.834	1.716	1.699	1.699	1.69	1.681	1.668	1.68	1.669	1.692	1.704	1.723	1.721	1.686	1.682	1.673	1.687	1.679	1.648	1.678	1.675	1.693	1.697	1.728	1.735	0.971
t430	0.789	0.744	0.727	0.715	0.75	0.72	0.751	0.762	0.757	0.764	0.784	0.82	0.839	0.736	0.704	0.715	0.753	0.777	0.774	0.754	0.764	0.786	0.756	0.833	1.719	1.702	1.702	1.693	1.684	1.673	1.684	1.674	1.696	1.708	1.727	1.724	1.691	1.686	1.678	1.689	1.683	1.652	1.681	1.68	1.697	1.7	1.732	1.739	0.971
t435	0.787	0.743	0.726	0.712	0.749	0.718	0.751	0.761	0.756	0.763	0.782	0.819	0.838	0.734	0.702	0.715	0.751	0.774	0.774	0.753	0.763	0.784	0.755	0.833	1.721	1.705	1.705	1.697	1.688	1.677	1.688	1.678	1.7	1.711	1.732	1.728	1.694	1.691	1.682	1.695	1.686	1.656	1.685	1.684	1.701	1.704	1.735	1.743	0.97
t440	0.786	0.741	0.725	0.711	0.748	0.718	0.749	0.761	0.754	0.762	0.781	0.819	0.837	0.734	0.701	0.715	0.75	0.773	0.772	0.752	0.762	0.785	0.755	0.832	1.724	1.708	1.708	1.7	1.69	1.68	1.69	1.681	1.703	1.714	1.733	1.732	1.697	1.694	1.685	1.697	1.69	1.659	1.689	1.686	1.703	1.708	1.738	1.746	0.969
t445	0.785	0.741	0.723	0.71	0.747	0.717	0.748	0.76	0.754	0.762	0.78	0.817	0.837	0.733	0.702	0.715	0.75	0.771	0.771	0.752	0.761	0.783	0.754	0.831	1.727	1.711	1.711	1.702	1.694	1.682	1.695	1.685	1.707	1.717	1.736	1.734	1.7	1.697	1.688	1.701	1.692	1.663	1.692	1.69	1.707	1.711	1.741	1.747	0.968
t450	0.785	0.74	0.723	0.71	0.746	0.716	0.748	0.759	0.753	0.76	0.779	0.817	0.835	0.732	0.701	0.712	0.748	0.771	0.77	0.75	0.76	0.781	0.753	0.83	1.729	1.713	1.713	1.706	1.697	1.687	1.699	1.689	1.71	1.721	1.74	1.737	1.703	1.701	1.692	1.704	1.696	1.667	1.694	1.693	1.71	1.714	1.745	1.752	0.969
t455	0.784	0.74	0.722	0.709	0.746	0.716	0.748	0.758	0.752	0.759	0.779	0.817	0.835	0.731	0.699	0.712	0.747	0.77	0.77	0.75	0.76	0.781	0.753	0.829	1.732	1.715	1.715	1.708	1.7	1.69	1.701	1.692	1.713	1.724	1.743	1.739	1.707	1.704	1.695	1.708	1.699	1.669	1.698	1.697	1.713	1.717	1.748	1.753	0.968
t460	0.783	0.739	0.721	0.707	0.744	0.715	0.747	0.758	0.752	0.759	0.778	0.815	0.833	0.731	0.699	0.71	0.747	0.769	0.769	0.75	0.758	0.779	0.752	0.828	1.735	1.718	1.717	1.71	1.703	1.694	1.705	1.695	1.715	1.725	1.746	1.742	1.709	1.707	1.698	1.71	1.702	1.674	1.702	1.7	1.716	1.719	1.75	1.755	0.967
t465	0.781	0.738	0.72	0.706	0.743	0.714	0.746	0.757	0.752	0.758	0.776	0.814	0.832	0.73	0.699	0.71	0.747	0.769	0.768	0.749	0.758	0.78	0.751	0.827	1.738	1.72	1.72	1.714	1.706	1.696	1.707	1.698	1.718	1.729	1.748	1.744	1.712	1.711	1.701	1.714	1.705	1.676	1.704	1.703	1.719	1.722	1.752	1.758	0.966
t470	0.78	0.737	0.721	0.705	0.743	0.714	0.744	0.756	0.75	0.758	0.777	0.813	0.832	0.73	0.698	0.71	0.746	0.768	0.767	0.748	0.759	0.779	0.752	0.827	1.739	1.722	1.721	1.716	1.709	1.698	1.711	1.701	1.721	1.73	1.75	1.746	1.714	1.714	1.704	1.716	1.708	1.68	1.707	1.707	1.72	1.724	1.754	1.76	0.965
t475	0.78	0.736	0.719	0.705	0.742	0.713	0.743	0.756	0.75	0.757	0.775	0.812	0.83	0.729	0.697	0.709	0.745	0.766	0.766	0.747	0.757	0.778	0.75	0.826	1.741	1.724	1.723	1.717	1.711	1.702	1.713	1.704	1.723	1.732	1.752	1.749	1.717	1.717	1.706	1.719	1.711	1.682	1.708	1.709	1.723	1.726	1.755	1.761	0.964
t480	0.779	0.735	0.718	0.704	0.741	0.712	0.742	0.755	0.75	0.756	0.775	0.813	0.831	0.727	0.696	0.707	0.744	0.766	0.765	0.747	0.756	0.777	0.75	0.825	1.744	1.726	1.726	1.719	1.713	1.705	1.715	1.706	1.725	1.734	1.755	1.75	1.719	1.718	1.709	1.722	1.712	1.685	1.711	1.711	1.727	1.729	1.758	1.762	0.964
t485	0.778	0.735	0.718	0.704	0.74	0.712	0.743	0.754	0.749	0.755	0.775	0.812	0.831	0.727	0.695	0.707	0.744	0.766	0.765	0.746	0.754	0.775	0.75	0.824	1.746	1.728	1.728	1.721	1.715	1.707	1.718	1.708	1.728	1.736	1.757	1.752	1.722	1.721	1.712	1.724	1.716	1.687	1.714	1.713	1.728	1.73	1.759	1.765	0.963
t490	0.778	0.735	0.717	0.704	0.74	0.711	0.742	0.754	0.747	0.755	0.772	0.811	0.829	0.727	0.695	0.706	0.743	0.765	0.764	0.745	0.754	0.774	0.749	0.822	1.748	1.73	1.728	1.722	1.716	1.709	1.72	1.71	1.73	1.739	1.759	1.755	1.724	1.724	1.713	1.725	1.718	1.69	1.716	1.716	1.73	1.733	1.761	1.766	0.962
t495	0.777	0.734	0.717	0.703	0.739	0.711	0.741	0.753	0.746	0.754	0.773	0.811	0.829	0.725	0.695	0.705	0.741	0.764	0.763	0.745	0.754	0.774	0.747	0.822	1.749	1.732	1.73	1.724	1.718	1.71	1.722	1.713	1.732	1.74	1.76	1.755	1.726	1.726	1.716	1.727	1.718	1.692	1.718	1.718	1.732	1.734	1.763	1.768	0.962
t500	0.775	0.734	0.716	0.702	0.738	0.71	0.741	0.752	0.746	0.753	0.772	0.808	0.828	0.725	0.695	0.705	0.741	0.763	0.761	0.744	0.752	0.773	0.747	0.821	1.751	1.734	1.731	1.725	1.72	1.713	1.724	1.714	1.733	1.742	1.762	1.757	1.728	1.729	1.718	1.729	1.72	1.694	1.719	1.72	1.734	1.737	1.764	1.769	0.961
t505	0.776	0.733	0.715	0.702	0.738	0.71	0.74	0.752	0.746	0.754	0.772	0.809	0.827	0.724	0.693	0.704	0.74	0.762	0.76	0.743	0.751	0.774	0.746	0.821	1.752	1.735	1.733	1.727	1.721	1.714	1.726	1.717	1.734	1.743	1.764	1.759	1.73	1.73	1.72	1.73	1.722	1.697	1.722	1.722	1.735	1.738	1.765	1.771	0.961
t510	0.775	0.732	0.715	0.702	0.737	0.709	0.74	0.751	0.744	0.753	0.771	0.808	0.827	0.724	0.693	0.705	0.74	0.762	0.761	0.742	0.751	0.772	0.745	0.82	1.754	1.737	1.736	1.728	1.723	1.716	1.726	1.718	1.736	1.745	1.764	1.761	1.732	1.732	1.722	1.733	1.724	1.699	1.724	1.724	1.735	1.739	1.767	1.773	0.96
t515	0.774	0.731	0.715	0.7	0.737	0.708	0.738	0.75	0.743	0.752	0.77	0.808	0.825	0.723	0.693	0.703	0.739	0.762	0.76	0.743	0.75	0.771	0.744	0.82	1.755	1.738	1.737	1.729	1.724	1.716	1.729	1.72	1.738	1.747	1.766	1.763	1.734	1.734	1.724	1.734	1.725	1.699	1.724	1.726	1.738	1.74	1.768	1.773	0.958
t520	0.773	0.73	0.714	0.701	0.736	0.707	0.737	0.75	0.743	0.751	0.769	0.806	0.827	0.721	0.692	0.703	0.739	0.76	0.758	0.742	0.749	0.77	0.744	0.817	1.757	1.739	1.737	1.731	1.726	1.719	1.73	1.721	1.739	1.748	1.768	1.765	1.735	1.736	1.725	1.735	1.726	1.701	1.726	1.726	1.739	1.74	1.769	1.775	0.957
t525	0.771	0.729	0.713	0.699	0.735	0.706	0.737	0.75	0.742	0.75	0.769	0.805	0.825	0.721	0.691	0.702	0.738	0.759	0.759	0.741	0.749	0.769	0.744	0.816	1.758	1.74	1.739	1.732	1.727	1.72	1.731	1.722	1.74	1.749	1.769	1.766	1.737	1.737	1.727	1.736	1.728	1.703	1.726	1.728	1.74	1.742	1.77	1.776	0.956
t530	0.772	0.729	0.714	0.699	0.735	0.707	0.736	0.749	0.741	0.75	0.767	0.806	0.825	0.721	0.69	0.702	0.739	0.76	0.758	0.74	0.748	0.769	0.743	0.816	1.759	1.741	1.739	1.733	1.727	1.721	1.731	1.723	1.741	1.75	1.77	1.767	1.738	1.739	1.728	1.738	1.728	1.704	1.728	1.731	1.742	1.744	1.772	1.776	0.955
t535	0.77	0.728	0.713	0.698	0.734	0.706	0.735	0.748	0.741	0.749	0.767	0.805	0.823	0.721	0.689	0.7	0.737	0.759	0.758	0.739	0.748	0.768	0.743	0.815	1.76	1.742	1.741	1.734	1.729	1.723	1.733	1.725	1.742	1.752	1.772	1.768	1.74	1.74	1.729	1.739	1.73	1.706	1.729	1.732	1.744	1.745	1.774	1.777	0.955
t540	0.769	0.728	0.712	0.697	0.733	0.705	0.733	0.748	0.741	0.748	0.766	0.804	0.822	0.72	0.689	0.701	0.736	0.758	0.757	0.739	0.747	0.769	0.742	0.815	1.761	1.744	1.742	1.735	1.73	1.724	1.734	1.727	1.743	1.752	1.772	1.769	1.742	1.741	1.73	1.74	1.73	1.707	1.73	1.733	1.745	1.746	1.773	1.778	0.953
t545	0.769	0.727	0.712	0.698	0.733	0.705	0.734	0.747	0.739	0.746	0.765	0.802	0.821	0.719	0.688	0.7	0.736	0.757	0.757	0.738	0.746	0.768	0.741	0.814	1.762	1.744	1.742	1.736	1.731	1.725	1.735	1.728	1.744	1.752	1.773	1.77	1.743	1.742	1.731	1.741	1.732	1.708	1.732	1.733	1.745	1.747	1.774	1.779	0.954
t550	0.769	0.727	0.711	0.696	0.732	0.704	0.734	0.747	0.74	0.747	0.766	0.802	0.821	0.718	0.689	0.7	0.735	0.757	0.756	0.738	0.746	0.767	0.741	0.813	1.762	1.745	1.743	1.737	1.732	1.726	1.737	1.729	1.746	1.754	1.774	1.772	1.743	1.744	1.733	1.742	1.732	1.709	1.733	1.735	1.747	1.748	1.775	1.78	0.953
t555	0.768	0.725	0.71	0.695	0.731	0.703	0.732	0.746	0.738	0.745	0.765	0.801	0.819	0.718	0.688	0.698	0.735	0.756	0.756	0.736	0.745	0.767	0.74	0.812	1.763	1.745	1.744	1.737	1.732	1.727	1.737	1.73	1.746	1.755	1.776	1.77	1.745	1.745	1.733	1.742	1.733	1.71	1.733	1.737	1.747	1.748	1.776	1.781	0.952
t560	0.767	0.724	0.71	0.696	0.731	0.704	0.732	0.745	0.738	0.745	0.764	0.801	0.82	0.718	0.688	0.698	0.734	0.756	0.754	0.736	0.744	0.766	0.739	0.812	1.764	1.746	1.744	1.738	1.734	1.728	1.738	1.73	1.747	1.755	1.776	1.772	1.745	1.746	1.735	1.743	1.734	1.711	1.734	1.736	1.749	1.749	1.776	1.78	0.952
t565	0.767	0.724	0.709	0.695	0.729	0.702	0.731	0.744	0.737	0.744	0.763	0.801	0.82	0.717	0.687	0.696	0.733	0.755	0.753	0.735	0.744	0.766	0.738	0.811	1.764	1.746	1.745	1.739	1.734	1.729	1.739	1.731	1.748	1.756	1.777	1.773	1.746	1.747	1.736	1.744	1.735	1.712	1.735	1.738	1.75	1.751	1.777	1.783	0.95
t570	0.766	0.724	0.708	0.694	0.729	0.702	0.73	0.745	0.737	0.744	0.763	0.8	0.818	0.717	0.686	0.697	0.733	0.754	0.754	0.735	0.744	0.764	0.737	0.811	1.765	1.747	1.745	1.74	1.735	1.73	1.74	1.732	1.748	1.757	1.778	1.774	1.747	1.748	1.736	1.744	1.736	1.713	1.736	1.738	1.751	1.751	1.778	1.783	0.95
t575	0.765	0.724	0.707	0.693	0.729	0.701	0.731	0.744	0.736	0.744	0.763	0.8	0.817	0.716	0.685	0.697	0.733	0.754	0.753	0.734	0.742	0.763	0.737	0.81	1.765	1.747	1.746	1.74	1.735	1.731	1.741	1.734	1.749	1.757	1.779	1.774	1.748	1.749	1.736	1.745	1.737	1.714	1.737	1.738	1.751	1.752	1.779	1.783	0.949
t580	0.765	0.723	0.707	0.694	0.728	0.7	0.729	0.743	0.736	0.744	0.762	0.799	0.817	0.715	0.684	0.696	0.732	0.753	0.752	0.733	0.741	0.763	0.737	0.81	1.766	1.747	1.746	1.74	1.736	1.731	1.741	1.734	1.75	1.759	1.779	1.774	1.748	1.748	1.738	1.746	1.737	1.714	1.737	1.741	1.751	1.752	1.778	1.784	0.948
t585	0.763	0.722	0.706	0.693	0.727	0.7	0.729	0.743	0.736	0.744	0.762	0.799	0.817	0.715	0.684	0.695	0.732	0.753	0.751	0.733	0.742	0.763	0.736	0.809	1.766	1.748	1.746	1.74	1.736	1.732	1.742	1.735	1.75	1.759	1.778	1.776	1.749	1.75	1.738	1.746	1.738	1.715	1.737	1.74	1.751	1.752	1.779	1.784	0.947
t590	0.763	0.722	0.706	0.693	0.727	0.699	0.729	0.742	0.736	0.743	0.76	0.799	0.816	0.715	0.683	0.695	0.731	0.753	0.751	0.732	0.74	0.762	0.736	0.809	1.767	1.749	1.747	1.741	1.737	1.732	1.741	1.735	1.751	1.759	1.779	1.777	1.749	1.751	1.739	1.747	1.738	1.716	1.738	1.741	1.752	1.753	1.78	1.784	0.947
t595	0.763	0.721	0.706	0.692	0.726	0.7	0.728	0.742	0.734	0.742	0.761	0.797	0.816	0.714	0.683	0.694	0.73	0.752	0.749	0.732	0.74	0.762	0.735	0.808	1.767	1.748	1.747	1.741	1.737	1.734	1.743	1.736	1.751	1.76	1.78	1.776	1.75	1.751	1.739	1.747	1.74	1.717	1.74	1.741	1.753	1.753	1.781	1.784	0.947
t600	0.762	0.72	0.705	0.691	0.725	0.699	0.727	0.741	0.734	0.741	0.76	0.796	0.815	0.713	0.683	0.693	0.731	0.751	0.749	0.731	0.74	0.759	0.735	0.807	1.768	1.748	1.747	1.742	1.737	1.733	1.742	1.736	1.752	1.76	1.78	1.776	1.751	1.752	1.74	1.748	1.74	1.717	1.74	1.742	1.753	1.754	1.781	1.784	0.946
t605	0.762	0.72	0.706	0.691	0.725	0.699	0.726	0.74	0.734	0.74	0.759	0.796	0.815	0.712	0.683	0.692	0.73	0.75	0.75	0.73	0.739	0.76	0.735	0.807	1.769	1.75	1.747	1.742	1.738	1.734	1.744	1.736	1.752	1.761	1.78	1.777	1.75	1.752	1.74	1.749	1.74	1.717	1.741	1.742	1.754	1.753	1.78	1.785	0.945
t610	0.761	0.72	0.705	0.69	0.724	0.698	0.726	0.74	0.733	0.74	0.758	0.796	0.814	0.711	0.683	0.692	0.728	0.75	0.747	0.73	0.738	0.759	0.734	0.807	1.768	1.75	1.748	1.742	1.738	1.734	1.744	1.737	1.752	1.76	1.781	1.778	1.752	1.753	1.741	1.748	1.742	1.718	1.74	1.743	1.754	1.754	1.78	1.785	0.944
t615	0.762	0.72	0.705	0.691	0.724	0.698	0.726	0.739	0.733	0.74	0.758	0.795	0.813	0.711	0.682	0.692	0.727	0.75	0.749	0.729	0.738	0.759	0.734	0.806	1.769	1.75	1.748	1.742	1.738	1.734	1.744	1.737	1.753	1.762	1.782	1.778	1.752	1.753	1.742	1.749	1.741	1.718	1.742	1.743	1.755	1.754	1.782	1.785	0.944
t620	0.761	0.719	0.704	0.69	0.723	0.696	0.725	0.739	0.732	0.739	0.759	0.795	0.812	0.71	0.682	0.691	0.729	0.749	0.747	0.729	0.738	0.758	0.733	0.805	1.769	1.75	1.748	1.742	1.739	1.735	1.745	1.737	1.753	1.761	1.782	1.777	1.753	1.754	1.741	1.749	1.741	1.718	1.742	1.744	1.754	1.754	1.781	1.785	0.944
t625	0.761	0.718	0.704	0.69	0.723	0.696	0.725	0.738	0.732	0.739	0.757	0.794	0.812	0.71	0.681	0.692	0.727	0.749	0.747	0.729	0.737	0.757	0.733	0.804	1.77	1.75	1.749	1.742	1.739	1.736	1.746	1.739	1.754	1.761	1.783	1.778	1.753	1.754	1.741	1.749	1.741	1.719	1.741	1.744	1.754	1.754	1.783	1.785	0.943
t630	0.76	0.717	0.704	0.689	0.722	0.695	0.724	0.738	0.732	0.738	0.756	0.793	0.811	0.709	0.68	0.69	0.725	0.748	0.746	0.728	0.737	0.756	0.732	0.804	1.77	1.751	1.748	1.744	1.739	1.735	1.744	1.738	1.754	1.762	1.783	1.778	1.753	1.754	1.741	1.75	1.741	1.719	1.742	1.744	1.754	1.755	1.782	1.786	0.942
t635	0.76	0.717	0.703	0.689	0.721	0.695	0.723	0.738	0.731	0.738	0.756	0.794	0.811	0.709	0.681	0.69	0.726	0.748	0.745	0.728	0.737	0.758	0.731	0.804	1.77	1.752	1.749	1.744	1.74	1.737	1.745	1.74	1.754	1.762	1.784	1.778	1.754	1.754	1.742	1.75	1.742	1.719	1.742	1.744	1.754	1.755	1.781	1.786	0.942
t640	0.759	0.716	0.702	0.688	0.721	0.695	0.722	0.737	0.731	0.737	0.756	0.791	0.81	0.708	0.68	0.689	0.725	0.747	0.744	0.727	0.736	0.757	0.731	0.802	1.77	1.751	1.749	1.744	1.739	1.736	1.745	1.738	1.754	1.762	1.784	1.779	1.754	1.755	1.743	1.75	1.742	1.72	1.743	1.744	1.755	1.754	1.781	1.787	0.942
t645	0.758	0.716	0.702	0.687	0.721	0.694	0.722	0.736	0.73	0.737	0.755	0.792	0.809	0.707	0.679	0.688	0.725	0.746	0.744	0.727	0.735	0.757	0.729	0.802	1.771	1.751	1.75	1.743	1.739	1.737	1.746	1.739	1.754	1.762	1.783	1.779	1.754	1.756	1.742	1.751	1.742	1.719	1.742	1.746	1.755	1.754	1.781	1.786	0.941
t650	0.757	0.715	0.701	0.687	0.719	0.694	0.722	0.736	0.73	0.736	0.754	0.792	0.808	0.707	0.679	0.69	0.725	0.745	0.744	0.727	0.735	0.756	0.73	0.803	1.771	1.752	1.75	1.743	1.74	1.736	1.746	1.739	1.754	1.761	1.784	1.779	1.754	1.755	1.742	1.75	1.742	1.72	1.742	1.744	1.755	1.754	1.782	1.786	0.941
t655	0.756	0.715	0.7	0.686	0.72	0.694	0.721	0.735	0.73	0.736	0.755	0.79	0.808	0.707	0.678	0.688	0.726	0.745	0.744	0.726	0.734	0.755	0.729	0.803	1.771	1.752	1.75	1.743	1.74	1.736	1.746	1.739	1.754	1.762	1.784	1.78	1.755	1.755	1.742	1.75	1.742	1.72	1.742	1.745	1.755	1.755	1.782	1.787	0.94
t660	0.756	0.715	0.7	0.685	0.719	0.694	0.721	0.735	0.729	0.735	0.754	0.79	0.807	0.706	0.677	0.688	0.723	0.744	0.742	0.726	0.735	0.755	0.729	0.802	1.771	1.752	1.75	1.743	1.739	1.736	1.745	1.739	1.754	1.763	1.784	1.779	1.755	1.756	1.743	1.751	1.742	1.72	1.742	1.746	1.756	1.755	1.781	1.787	0.939
t665	0.756	0.714	0.7	0.685	0.719	0.693	0.721	0.735	0.729	0.735	0.753	0.789	0.807	0.706	0.677	0.688	0.723	0.745	0.743	0.725	0.734	0.755	0.729	0.801	1.771	1.752	1.75	1.744	1.739	1.736	1.745	1.74	1.754	1.763	1.783	1.781	1.756	1.756	1.743	1.751	1.743	1.72	1.743	1.745	1.755	1.755	1.781	1.786	0.94
t670	0.755	0.714	0.699	0.685	0.718	0.692	0.719	0.735	0.728	0.734	0.753	0.788	0.807	0.706	0.678	0.687	0.722	0.744	0.742	0.725	0.733	0.753	0.729	0.8	1.772	1.753	1.75	1.743	1.74	1.736	1.746	1.738	1.754	1.763	1.785	1.78	1.756	1.757	1.744	1.751	1.742	1.72	1.742	1.744	1.755	1.755	1.781	1.787	0.939
t675	0.754	0.713	0.698	0.685	0.718	0.692	0.72	0.734	0.727	0.734	0.753	0.787	0.806	0.705	0.677	0.686	0.721	0.743	0.743	0.725	0.733	0.753	0.728	0.8	1.773	1.753	1.75	1.743	1.739	1.736	1.745	1.74	1.755	1.762	1.784	1.78	1.756	1.756	1.743	1.751	1.742	1.72	1.742	1.745	1.756	1.755	1.782	1.787	0.939
t680	0.754	0.713	0.698	0.684	0.717	0.691	0.718	0.733	0.727	0.734	0.753	0.787	0.806	0.705	0.676	0.686	0.721	0.743	0.741	0.725	0.732	0.754	0.728	0.8	1.773	1.753	1.751	1.743	1.74	1.737	1.746	1.74	1.754	1.763	1.784	1.781	1.757	1.757	1.744	1.751	1.742	1.721	1.742	1.745	1.756	1.755	1.782	1.787	0.938
t685	0.753	0.712	0.698	0.684	0.716	0.691	0.718	0.732	0.727	0.735	0.752	0.786	0.805	0.704	0.675	0.685	0.721	0.742	0.741	0.724	0.733	0.753	0.727	0.799	1.773	1.753	1.751	1.744	1.74	1.737	1.745	1.739	1.754	1.763	1.784	1.781	1.757	1.757	1.744	1.752	1.742	1.721	1.742	1.746	1.756	1.755	1.781	1.786	0.938
t690	0.754	0.712	0.697	0.684	0.716	0.69	0.718	0.731	0.727	0.733	0.751	0.787	0.804	0.704	0.674	0.685	0.72	0.742	0.74	0.723	0.731	0.753	0.727	0.797	1.773	1.753	1.75	1.744	1.739	1.736	1.745	1.74	1.755	1.762	1.784	1.781	1.757	1.757	1.744	1.752	1.742	1.721	1.742	1.746	1.754	1.755	1.782	1.787	0.937
t695	0.753	0.712	0.697	0.683	0.716	0.69	0.717	0.731	0.727	0.734	0.751	0.786	0.804	0.704	0.675	0.685	0.72	0.742	0.74	0.723	0.731	0.752	0.726	0.798	1.774	1.754	1.751	1.744	1.74	1.737	1.746	1.738	1.753	1.761	1.784	1.781	1.758	1.758	1.744	1.751	1.742	1.72	1.741	1.744	1.755	1.755	1.781	1.786	0.939
t700	0.751	0.712	0.697	0.683	0.715	0.689	0.718	0.731	0.726	0.732	0.75	0.785	0.804	0.703	0.674	0.684	0.72	0.742	0.739	0.723	0.731	0.753	0.726	0.798	1.773	1.754	1.751	1.744	1.74	1.738	1.746	1.739	1.754	1.762	1.784	1.781	1.758	1.758	1.743	1.751	1.742	1.721	1.742	1.746	1.755	1.754	1.782	1.786	0.938
t705	0.751	0.711	0.696	0.682	0.716	0.689	0.717	0.73	0.726	0.732	0.749	0.785	0.804	0.703	0.674	0.684	0.72	0.741	0.74	0.722	0.73	0.752	0.725	0.797	1.774	1.754	1.751	1.745	1.74	1.737	1.746	1.738	1.754	1.762	1.784	1.78	1.758	1.758	1.745	1.753	1.742	1.721	1.742	1.745	1.755	1.755	1.782	1.787	0.937
t710	0.75	0.711	0.696	0.682	0.715	0.688	0.716	0.73	0.725	0.731	0.749	0.784	0.803	0.703	0.674	0.685	0.72	0.741	0.74	0.722	0.73	0.752	0.725	0.796	1.774	1.754	1.751	1.745	1.74	1.737	1.746	1.739	1.755	1.763	1.785	1.782	1.759	1.758	1.745	1.752	1.742	1.721	1.742	1.746	1.755	1.754	1.781	1.787	0.938
t715	0.75	0.711	0.695	0.681	0.715	0.688	0.715	0.729	0.725	0.731	0.749	0.783	0.803	0.702	0.673	0.684	0.718	0.741	0.739	0.72	0.73	0.752	0.725	0.796	1.774	1.754	1.752	1.745	1.74	1.737	1.746	1.74	1.755	1.763	1.784	1.781	1.758	1.758	1.745	1.752	1.742	1.721	1.741	1.745	1.755	1.754	1.782	1.786	0.938
t720	0.749	0.711	0.695	0.681	0.715	0.688	0.715	0.73	0.724	0.731	0.749	0.783	0.802	0.702	0.672	0.684	0.718	0.74	0.739	0.721	0.73	0.751	0.725	0.796	1.774	1.754	1.751	1.745	1.74	1.736	1.746	1.739	1.754	1.763	1.784	1.781	1.759	1.759	1.746	1.752	1.742	1.722	1.742	1.744	1.754	1.754	1.782	1.787	0.938
t725	0.749	0.71	0.695	0.681	0.715	0.687	0.715	0.729	0.724	0.73	0.748	0.782	0.802	0.701	0.672	0.683	0.718	0.74	0.738	0.72	0.729	0.751	0.725	0.795	1.775	1.755	1.752	1.744	1.74	1.737	1.746	1.739	1.754	1.763	1.784	1.781	1.759	1.759	1.746	1.752	1.742	1.722	1.742	1.745	1.755	1.754	1.782	1.787	0.938
t730	0.749	0.709	0.694	0.68	0.715	0.687	0.715	0.728	0.724	0.73	0.747	0.782	0.802	0.701	0.672	0.684	0.718	0.739	0.738	0.719	0.729	0.751	0.724	0.794	1.775	1.756	1.752	1.745	1.74	1.736	1.746	1.738	1.754	1.763	1.784	1.782	1.76	1.759	1.746	1.753	1.742	1.722	1.742	1.745	1.755	1.753	1.781	1.787	0.937
t735	0.747	0.709	0.694	0.68	0.714	0.686	0.715	0.728	0.723	0.73	0.747	0.782	0.802	0.7	0.67	0.681	0.716	0.738	0.737	0.719	0.729	0.751	0.724	0.795	1.775	1.755	1.752	1.745	1.74	1.738	1.746	1.739	1.754	1.763	1.785	1.781	1.76	1.759	1.746	1.753	1.742	1.722	1.742	1.744	1.754	1.754	1.781	1.787	0.937
t740	0.747	0.709	0.693	0.679	0.713	0.685	0.713	0.728	0.724	0.73	0.747	0.782	0.802	0.7	0.67	0.682	0.716	0.738	0.736	0.719	0.728	0.751	0.724	0.794	1.776	1.755	1.752	1.744	1.74	1.739	1.746	1.74	1.753	1.763	1.784	1.782	1.759	1.76	1.747	1.753	1.743	1.721	1.742	1.745	1.754	1.754	1.781	1.787	0.937
t745	0.747	0.708	0.693	0.679	0.713	0.685	0.713	0.728	0.723	0.729	0.747	0.781	0.801	0.7	0.671	0.682	0.716	0.738	0.737	0.719	0.729	0.748	0.723	0.793	1.777	1.755	1.752	1.745	1.74	1.738	1.746	1.739	1.755	1.763	1.784	1.783	1.76	1.76	1.747	1.753	1.743	1.722	1.742	1.745	1.755	1.755	1.781	1.788	0.937
t750	0.746	0.708	0.692	0.678	0.712	0.685	0.713	0.727	0.722	0.729	0.747	0.781	0.801	0.699	0.67	0.681	0.715	0.738	0.737	0.717	0.728	0.75	0.723	0.793	1.776	1.756	1.753	1.745	1.74	1.738	1.746	1.74	1.755	1.763	1.785	1.783	1.76	1.76	1.747	1.753	1.743	1.722	1.743	1.745	1.754	1.755	1.78	1.787	0.937
t755	0.745	0.708	0.693	0.678	0.712	0.685	0.714	0.726	0.722	0.727	0.746	0.781	0.799	0.699	0.669	0.681	0.715	0.737	0.736	0.717	0.728	0.75	0.723	0.79	1.777	1.756	1.753	1.745	1.741	1.738	1.746	1.74	1.754	1.763	1.785	1.781	1.76	1.76	1.748	1.753	1.742	1.722	1.742	1.745	1.754	1.755	1.782	1.786	0.938
t760	0.745	0.707	0.692	0.677	0.712	0.684	0.712	0.726	0.721	0.728	0.746	0.781	0.799	0.699	0.669	0.681	0.715	0.737	0.735	0.718	0.727	0.749	0.722	0.791	1.777	1.755	1.752	1.746	1.741	1.738	1.746	1.739	1.754	1.763	1.785	1.782	1.761	1.761	1.748	1.753	1.743	1.721	1.743	1.745	1.754	1.755	1.781	1.787	0.937
t765	0.744	0.707	0.691	0.677	0.712	0.684	0.712	0.725	0.721	0.728	0.745	0.779	0.799	0.698	0.669	0.681	0.715	0.737	0.736	0.717	0.727	0.749	0.722	0.791	1.777	1.756	1.753	1.746	1.741	1.738	1.746	1.74	1.755	1.763	1.785	1.783	1.761	1.761	1.747	1.752	1.743	1.722	1.742	1.745	1.755	1.755	1.782	1.787	0.937
t770	0.744	0.707	0.691	0.678	0.711	0.684	0.713	0.725	0.721	0.727	0.745	0.779	0.798	0.698	0.669	0.681	0.715	0.737	0.737	0.717	0.726	0.748	0.721	0.791	1.777	1.756	1.753	1.746	1.741	1.738	1.747	1.739	1.755	1.763	1.785	1.783	1.762	1.761	1.748	1.753	1.743	1.722	1.743	1.745	1.754	1.755	1.782	1.788	0.937
t775	0.744	0.706	0.691	0.677	0.711	0.684	0.712	0.725	0.72	0.727	0.744	0.778	0.798	0.697	0.668	0.681	0.714	0.737	0.735	0.717	0.726	0.748	0.721	0.79	1.778	1.756	1.754	1.746	1.742	1.739	1.746	1.74	1.754	1.764	1.785	1.784	1.763	1.761	1.748	1.753	1.742	1.723	1.743	1.745	1.755	1.756	1.782	1.787	0.938
t780	0.743	0.706	0.69	0.676	0.71	0.683	0.711	0.725	0.72	0.726	0.745	0.778	0.797	0.697	0.669	0.68	0.714	0.736	0.735	0.717	0.727	0.748	0.72	0.788	1.778	1.756	1.754	1.746	1.741	1.738	1.746	1.739	1.754	1.763	1.785	1.784	1.763	1.762	1.748	1.753	1.743	1.722	1.742	1.746	1.755	1.755	1.781	1.787	0.937
t785	0.744	0.706	0.69	0.676	0.71	0.684	0.711	0.725	0.72	0.725	0.745	0.778	0.797	0.696	0.668	0.679	0.714	0.736	0.734	0.716	0.726	0.748	0.721	0.79	1.778	1.756	1.754	1.746	1.741	1.739	1.747	1.74	1.755	1.764	1.785	1.783	1.763	1.762	1.749	1.754	1.743	1.722	1.742	1.746	1.755	1.755	1.782	1.786	0.938
t790	0.743	0.706	0.689	0.676	0.709	0.682	0.711	0.724	0.72	0.726	0.743	0.777	0.796	0.696	0.668	0.679	0.713	0.735	0.735	0.716	0.726	0.746	0.719	0.788	1.779	1.757	1.754	1.745	1.742	1.738	1.746	1.74	1.754	1.763	1.786	1.784	1.763	1.763	1.749	1.754	1.743	1.723	1.742	1.745	1.755	1.755	1.781	1.788	0.938
t795	0.743	0.705	0.688	0.675	0.709	0.682	0.71	0.724	0.72	0.726	0.743	0.777	0.796	0.696	0.668	0.679	0.713	0.735	0.735	0.715	0.725	0.747	0.719	0.789	1.779	1.757	1.754	1.746	1.742	1.739	1.746	1.74	1.754	1.762	1.785	1.782	1.763	1.763	1.749	1.754	1.743	1.721	1.743	1.746	1.754	1.755	1.782	1.788	0.938
t800	0.742	0.705	0.688	0.676	0.71	0.681	0.71	0.723	0.719	0.725	0.743	0.776	0.796	0.695	0.666	0.678	0.713	0.735	0.734	0.715	0.725	0.747	0.72	0.789	1.778	1.757	1.755	1.746	1.742	1.74	1.747	1.739	1.754	1.763	1.785	1.783	1.764	1.762	1.749	1.754	1.743	1.722	1.743	1.746	1.755	1.756	1.783	1.788	0.939
t805	0.741	0.704	0.688	0.674	0.71	0.682	0.71	0.723	0.719	0.725	0.743	0.775	0.796	0.695	0.667	0.678	0.713	0.734	0.734	0.714	0.724	0.747	0.719	0.789	1.779	1.757	1.754	1.746	1.742	1.739	1.746	1.739	1.754	1.762	1.786	1.784	1.763	1.762	1.749	1.754	1.743	1.722	1.742	1.746	1.755	1.755	1.782	1.788	0.939
t810	0.74	0.703	0.688	0.674	0.709	0.681	0.709	0.723	0.719	0.725	0.743	0.775	0.795	0.694	0.666	0.678	0.712	0.734	0.734	0.713	0.724	0.746	0.718	0.788	1.779	1.758	1.754	1.746	1.742	1.739	1.746	1.74	1.754	1.763	1.785	1.784	1.764	1.764	1.749	1.754	1.743	1.722	1.742	1.745	1.755	1.755	1.781	1.788	0.939
t815	0.74	0.703	0.687	0.674	0.709	0.681	0.709	0.722	0.718	0.723	0.743	0.774	0.795	0.695	0.666	0.677	0.711	0.733	0.733	0.713	0.724	0.745	0.716	0.788	1.779	1.757	1.755	1.746	1.742	1.739	1.745	1.74	1.754	1.763	1.786	1.783	1.765	1.764	1.749	1.754	1.743	1.722	1.742	1.745	1.754	1.755	1.782	1.788	0.939
t820	0.739	0.703	0.687	0.675	0.71	0.681	0.709	0.722	0.717	0.724	0.742	0.774	0.794	0.695	0.666	0.677	0.712	0.733	0.734	0.713	0.724	0.746	0.718	0.787	1.779	1.758	1.755	1.746	1.742	1.738	1.745	1.74	1.754	1.763	1.786	1.782	1.765	1.763	1.75	1.755	1.744	1.722	1.742	1.745	1.756	1.755	1.782	1.788	0.939
t825	0.74	0.702	0.687	0.673	0.709	0.68	0.708	0.722	0.718	0.724	0.741	0.774	0.793	0.694	0.666	0.677	0.711	0.733	0.733	0.713	0.723	0.746	0.717	0.786	1.779	1.758	1.756	1.746	1.742	1.74	1.746	1.74	1.754	1.764	1.786	1.784	1.765	1.764	1.75	1.755	1.744	1.723	1.742	1.746	1.755	1.755	1.782	1.789	0.939
t830	0.738	0.702	0.686	0.673	0.71	0.68	0.708	0.721	0.718	0.724	0.741	0.774	0.794	0.694	0.664	0.676	0.71	0.732	0.735	0.714	0.724	0.746	0.717	0.787	1.78	1.758	1.756	1.747	1.743	1.74	1.746	1.74	1.755	1.763	1.786	1.784	1.766	1.764	1.75	1.755	1.744	1.722	1.743	1.746	1.755	1.755	1.783	1.789	0.94
t835	0.739	0.702	0.686	0.673	0.709	0.68	0.708	0.721	0.718	0.724	0.74	0.773	0.793	0.694	0.665	0.677	0.712	0.732	0.735	0.713	0.723	0.745	0.717	0.786	1.78	1.759	1.756	1.747	1.742	1.74	1.746	1.741	1.754	1.763	1.786	1.784	1.766	1.764	1.751	1.755	1.744	1.722	1.743	1.746	1.756	1.755	1.782	1.789	0.941
t840	0.739	0.702	0.686	0.672	0.708	0.68	0.707	0.721	0.718	0.723	0.74	0.772	0.793	0.693	0.665	0.675	0.711	0.732	0.733	0.713	0.723	0.744	0.716	0.785	1.78	1.759	1.756	1.747	1.742	1.739	1.747	1.741	1.755	1.764	1.786	1.784	1.766	1.764	1.75	1.754	1.744	1.722	1.743	1.746	1.755	1.754	1.783	1.789	0.941
t845	0.738	0.701	0.686	0.672	0.707	0.679	0.707	0.721	0.717	0.723	0.74	0.772	0.793	0.693	0.664	0.675	0.71	0.733	0.733	0.713	0.723	0.743	0.716	0.786	1.78	1.759	1.756	1.746	1.742	1.739	1.747	1.741	1.755	1.765	1.786	1.785	1.766	1.766	1.75	1.755	1.744	1.723	1.743	1.746	1.756	1.755	1.781	1.788	0.941
t850	0.738	0.701	0.686	0.672	0.707	0.679	0.707	0.72	0.717	0.723	0.74	0.772	0.793	0.693	0.664	0.676	0.709	0.731	0.733	0.713	0.723	0.744	0.716	0.786	1.78	1.759	1.757	1.747	1.743	1.74	1.746	1.741	1.754	1.764	1.786	1.785	1.766	1.765	1.75	1.754	1.745	1.723	1.743	1.745	1.755	1.754	1.782	1.789	0.943
t855	0.737	0.701	0.685	0.672	0.707	0.679	0.707	0.721	0.715	0.722	0.74	0.771	0.792	0.693	0.664	0.675	0.709	0.731	0.733	0.712	0.722	0.744	0.716	0.785	1.781	1.759	1.756	1.747	1.743	1.739	1.747	1.741	1.755	1.766	1.786	1.784	1.766	1.766	1.75	1.756	1.744	1.723	1.743	1.746	1.757	1.756	1.783	1.789	0.942
t860	0.737	0.701	0.685	0.671	0.707	0.679	0.707	0.72	0.716	0.721	0.74	0.771	0.791	0.693	0.665	0.674	0.709	0.731	0.732	0.712	0.723	0.744	0.716	0.785	1.781	1.76	1.757	1.747	1.743	1.74	1.747	1.741	1.755	1.764	1.786	1.785	1.766	1.765	1.751	1.755	1.745	1.723	1.743	1.746	1.755	1.754	1.783	1.789	0.943
t865	0.736	0.7	0.684	0.67	0.706	0.679	0.706	0.72	0.716	0.721	0.74	0.771	0.791	0.692	0.663	0.674	0.708	0.731	0.731	0.712	0.722	0.743	0.716	0.785	1.781	1.76	1.757	1.747	1.744	1.74	1.747	1.74	1.755	1.764	1.786	1.784	1.767	1.766	1.75	1.755	1.745	1.723	1.744	1.745	1.756	1.755	1.784	1.79	0.942
t870	0.736	0.7	0.684	0.67	0.706	0.679	0.706	0.72	0.715	0.72	0.739	0.769	0.79	0.692	0.664	0.675	0.71	0.73	0.732	0.712	0.722	0.743	0.715	0.785	1.782	1.76	1.757	1.747	1.744	1.74	1.747	1.74	1.756	1.765	1.786	1.785	1.767	1.766	1.75	1.756	1.745	1.723	1.744	1.745	1.756	1.754	1.783	1.789	0.943
t875	0.735	0.699	0.684	0.67	0.705	0.678	0.706	0.72	0.716	0.721	0.739	0.771	0.79	0.692	0.663	0.675	0.709	0.731	0.732	0.71	0.722	0.742	0.716	0.784	1.782	1.76	1.757	1.747	1.744	1.74	1.747	1.742	1.755	1.764	1.787	1.784	1.767	1.766	1.752	1.756	1.745	1.722	1.744	1.745	1.756	1.755	1.782	1.788	0.943
t880	0.735	0.699	0.683	0.67	0.706	0.679	0.706	0.719	0.715	0.72	0.739	0.769	0.79	0.692	0.663	0.675	0.708	0.73	0.732	0.71	0.721	0.743	0.715	0.784	1.782	1.76	1.757	1.747	1.743	1.74	1.748	1.741	1.756	1.765	1.786	1.786	1.768	1.766	1.752	1.756	1.745	1.723	1.744	1.746	1.756	1.755	1.783	1.789	0.943
t885	0.735	0.699	0.683	0.67	0.705	0.678	0.706	0.719	0.715	0.72	0.738	0.769	0.789	0.691	0.663	0.674	0.708	0.73	0.732	0.711	0.721	0.742	0.715	0.783	1.782	1.76	1.757	1.747	1.744	1.741	1.748	1.741	1.755	1.765	1.786	1.786	1.767	1.766	1.751	1.755	1.745	1.723	1.744	1.746	1.756	1.755	1.783	1.789	0.944
t890	0.734	0.699	0.683	0.67	0.704	0.678	0.705	0.719	0.715	0.72	0.738	0.77	0.789	0.691	0.662	0.674	0.708	0.729	0.731	0.71	0.721	0.741	0.715	0.784	1.782	1.761	1.757	1.748	1.744	1.74	1.747	1.741	1.755	1.765	1.787	1.784	1.768	1.767	1.751	1.756	1.745	1.722	1.743	1.746	1.756	1.756	1.783	1.789	0.945
t895	0.734	0.699	0.684	0.67	0.704	0.678	0.705	0.72	0.714	0.72	0.737	0.768	0.788	0.691	0.663	0.674	0.709	0.731	0.732	0.711	0.721	0.742	0.715	0.783	1.783	1.761	1.757	1.748	1.744	1.74	1.747	1.741	1.755	1.764	1.787	1.786	1.768	1.767	1.751	1.757	1.746	1.723	1.743	1.747	1.756	1.756	1.784	1.789	0.944
t900	0.734	0.699	0.683	0.67	0.705	0.678	0.705	0.719	0.715	0.72	0.737	0.768	0.788	0.691	0.663	0.675	0.709	0.728	0.732	0.71	0.72	0.742	0.714	0.783	1.782	1.761	1.758	1.748	1.744	1.741	1.748	1.742	1.755	1.765	1.788	1.785	1.769	1.767	1.752	1.758	1.746	1.723	1.744	1.747	1.756	1.756	1.785	1.79	0.944
t905	0.733	0.698	0.683	0.669	0.704	0.678	0.705	0.719	0.714	0.718	0.736	0.768	0.788	0.69	0.662	0.673	0.708	0.728	0.731	0.71	0.72	0.741	0.713	0.783	1.782	1.762	1.758	1.748	1.744	1.741	1.747	1.742	1.756	1.765	1.787	1.786	1.77	1.767	1.752	1.757	1.746	1.722	1.744	1.745	1.756	1.755	1.785	1.789	0.944
t910	0.733	0.698	0.682	0.669	0.704	0.678	0.704	0.718	0.713	0.719	0.737	0.767	0.787	0.69	0.662	0.672	0.707	0.728	0.73	0.71	0.721	0.742	0.714	0.783	1.782	1.762	1.758	1.749	1.744	1.741	1.751	1.741	1.755	1.765	1.787	1.787	1.77	1.768	1.752	1.757	1.746	1.722	1.744	1.746	1.756	1.755	1.783	1.789	0.945
t915	0.732	0.697	0.681	0.668	0.704	0.676	0.704	0.718	0.714	0.719	0.737	0.768	0.787	0.69	0.662	0.672	0.707	0.729	0.73	0.709	0.719	0.74	0.712	0.783	1.783	1.761	1.758	1.749	1.744	1.74	1.751	1.741	1.755	1.765	1.787	1.786	1.769	1.767	1.752	1.757	1.746	1.722	1.744	1.746	1.756	1.755	1.784	1.789	0.945
t920	0.733	0.697	0.682	0.669	0.704	0.677	0.705	0.718	0.714	0.718	0.735	0.766	0.787	0.69	0.662	0.671	0.707	0.728	0.73	0.71	0.72	0.741	0.713	0.783	1.783	1.762	1.758	1.749	1.745	1.74	1.751	1.741	1.755	1.765	1.788	1.787	1.769	1.767	1.752	1.757	1.746	1.723	1.744	1.747	1.756	1.755	1.784	1.788	0.946
t925	0.732	0.697	0.681	0.668	0.703	0.676	0.704	0.717	0.714	0.719	0.735	0.766	0.787	0.69	0.662	0.673	0.707	0.726	0.729	0.709	0.719	0.739	0.712	0.782	1.784	1.762	1.758	1.75	1.745	1.741	1.75	1.742	1.755	1.764	1.788	1.787	1.77	1.768	1.753	1.757	1.746	1.723	1.744	1.746	1.755	1.755	1.784	1.789	0.945
t930	0.732	0.697	0.681	0.669	0.703	0.677	0.704	0.718	0.713	0.718	0.735	0.765	0.787	0.69	0.661	0.673	0.706	0.727	0.728	0.709	0.719	0.741	0.713	0.781	1.783	1.762	1.758	1.75	1.745	1.741	1.752	1.742	1.756	1.764	1.788	1.788	1.77	1.768	1.753	1.758	1.746	1.723	1.745	1.746	1.756	1.755	1.785	1.789	0.946
t935	0.732	0.696	0.68	0.668	0.703	0.676	0.704	0.717	0.713	0.719	0.735	0.765	0.786	0.689	0.66	0.672	0.706	0.727	0.728	0.709	0.719	0.74	0.713	0.781	1.783	1.762	1.758	1.749	1.745	1.741	1.752	1.742	1.755	1.764	1.787	1.787	1.77	1.768	1.753	1.758	1.746	1.724	1.745	1.746	1.756	1.755	1.785	1.79	0.947
t940	0.731	0.695	0.68	0.668	0.702	0.675	0.704	0.717	0.713	0.719	0.735	0.765	0.785	0.69	0.661	0.673	0.706	0.727	0.729	0.708	0.718	0.738	0.711	0.781	1.784	1.763	1.759	1.75	1.746	1.74	1.751	1.741	1.755	1.766	1.787	1.786	1.77	1.768	1.753	1.757	1.747	1.723	1.744	1.746	1.756	1.756	1.786	1.789	0.946
t945	0.731	0.695	0.679	0.668	0.701	0.676	0.704	0.717	0.712	0.719	0.735	0.765	0.785	0.689	0.661	0.671	0.706	0.728	0.728	0.708	0.718	0.74	0.712	0.781	1.784	1.762	1.759	1.75	1.745	1.741	1.751	1.741	1.755	1.765	1.787	1.787	1.771	1.769	1.752	1.757	1.747	1.724	1.745	1.746	1.756	1.755	1.786	1.79	0.947
t950	0.73	0.695	0.679	0.668	0.701	0.676	0.704	0.716	0.712	0.718	0.735	0.764	0.785	0.688	0.661	0.672	0.706	0.726	0.728	0.708	0.718	0.74	0.712	0.78	1.785	1.762	1.759	1.749	1.746	1.741	1.752	1.742	1.755	1.766	1.787	1.787	1.771	1.77	1.753	1.758	1.747	1.724	1.745	1.748	1.757	1.756	1.786	1.79	0.947
t955	0.73	0.695	0.679	0.667	0.701	0.675	0.704	0.717	0.712	0.717	0.734	0.764	0.786	0.689	0.66	0.67	0.706	0.727	0.727	0.708	0.718	0.74	0.711	0.78	1.785	1.763	1.759	1.75	1.746	1.741	1.751	1.742	1.755	1.765	1.788	1.787	1.771	1.769	1.753	1.758	1.747	1.724	1.745	1.747	1.757	1.756	1.785	1.79	0.948
t960	0.729	0.694	0.679	0.667	0.701	0.675	0.704	0.716	0.712	0.717	0.733	0.763	0.785	0.688	0.66	0.673	0.706	0.727	0.728	0.708	0.717	0.738	0.711	0.779	1.785	1.763	1.759	1.75	1.746	1.742	1.751	1.742	1.755	1.765	1.788	1.786	1.771	1.77	1.754	1.758	1.748	1.723	1.745	1.747	1.756	1.755	1.786	1.791	0.948
t965	0.728	0.694	0.678	0.667	0.701	0.675	0.703	0.716	0.711	0.716	0.733	0.762	0.786	0.688	0.66	0.671	0.705	0.727	0.727	0.707	0.718	0.739	0.711	0.779	1.786	1.763	1.759	1.749	1.745	1.741	1.752	1.742	1.755	1.765	1.787	1.788	1.771	1.77	1.754	1.757	1.748	1.724	1.744	1.747	1.756	1.756	1.786	1.791	0.948
t970	0.728	0.694	0.678	0.667	0.701	0.675	0.703	0.716	0.712	0.717	0.733	0.762	0.786	0.687	0.66	0.671	0.706	0.727	0.728	0.708	0.717	0.739	0.71	0.779	1.785	1.763	1.759	1.749	1.746	1.742	1.752	1.742	1.756	1.767	1.788	1.787	1.771	1.77	1.754	1.758	1.747	1.724	1.745	1.748	1.757	1.756	1.787	1.791	0.949
t975	0.728	0.694	0.678	0.667	0.7	0.675	0.703	0.716	0.711	0.717	0.733	0.762	0.785	0.688	0.66	0.671	0.705	0.727	0.726	0.707	0.717	0.739	0.711	0.779	1.786	1.763	1.759	1.749	1.746	1.742	1.751	1.742	1.756	1.767	1.788	1.788	1.772	1.77	1.754	1.758	1.748	1.724	1.745	1.749	1.757	1.756	1.786	1.791	0.949
t980	0.727	0.693	0.678	0.666	0.7	0.674	0.703	0.716	0.711	0.716	0.733	0.761	0.784	0.687	0.66	0.67	0.705	0.727	0.727	0.708	0.718	0.739	0.711	0.778	1.786	1.763	1.76	1.75	1.745	1.742	1.751	1.742	1.756	1.766	1.788	1.787	1.772	1.77	1.754	1.758	1.748	1.724	1.745	1.748	1.756	1.756	1.787	1.791	0.95
t985	0.727	0.693	0.677	0.667	0.7	0.674	0.704	0.716	0.711	0.716	0.732	0.76	0.784	0.687	0.66	0.671	0.705	0.728	0.726	0.707	0.716	0.738	0.711	0.778	1.786	1.763	1.759	1.75	1.746	1.742	1.752	1.742	1.756	1.765	1.788	1.787	1.772	1.77	1.754	1.758	1.747	1.723	1.745	1.747	1.756	1.756	1.787	1.791	0.951
t990	0.727	0.693	0.677	0.667	0.7	0.675	0.703	0.716	0.712	0.716	0.732	0.76	0.785	0.687	0.659	0.67	0.705	0.726	0.727	0.708	0.716	0.737	0.709	0.777	1.786	1.763	1.759	1.75	1.746	1.742	1.752	1.742	1.755	1.767	1.789	1.788	1.772	1.77	1.754	1.758	1.748	1.727	1.745	1.747	1.756	1.757	1.787	1.791	0.951
t995	0.726	0.693	0.677	0.666	0.7	0.675	0.703	0.716	0.711	0.715	0.731	0.76	0.784	0.686	0.659	0.672	0.704	0.727	0.727	0.706	0.716	0.737	0.709	0.777	1.786	1.763	1.76	1.75	1.746	1.742	1.752	1.742	1.756	1.766	1.789	1.788	1.772	1.77	1.754	1.759	1.748	1.727	1.744	1.747	1.757	1.756	1.786	1.791	0.953
t1000	0.726	0.692	0.677	0.666	0.7	0.674	0.702	0.716	0.711	0.716	0.732	0.76	0.784	0.686	0.659	0.671	0.704	0.726	0.726	0.707	0.716	0.738	0.71	0.777	1.786	1.764	1.76	1.75	1.746	1.743	1.752	1.742	1.757	1.767	1.789	1.787	1.772	1.77	1.754	1.759	1.748	1.727	1.744	1.748	1.757	1.757	1.786	1.79	0.952
t1005	0.726	0.692	0.677	0.665	0.7	0.674	0.703	0.715	0.711	0.715	0.731	0.76	0.783	0.686	0.659	0.67	0.704	0.726	0.725	0.706	0.716	0.735	0.709	0.777	1.786	1.763	1.76	1.751	1.746	1.743	1.752	1.742	1.755	1.766	1.788	1.788	1.772	1.77	1.754	1.759	1.748	1.728	1.745	1.747	1.756	1.757	1.786	1.791	0.952
t1010	0.725	0.691	0.677	0.665	0.699	0.674	0.703	0.714	0.71	0.714	0.731	0.76	0.784	0.686	0.658	0.671	0.704	0.726	0.725	0.706	0.715	0.737	0.709	0.777	1.786	1.764	1.76	1.751	1.747	1.743	1.752	1.742	1.756	1.766	1.79	1.788	1.772	1.771	1.754	1.759	1.748	1.728	1.745	1.748	1.757	1.757	1.786	1.791	0.953
t1015	0.725	0.691	0.676	0.665	0.7	0.673	0.702	0.714	0.71	0.715	0.731	0.76	0.783	0.686	0.658	0.671	0.704	0.726	0.726	0.706	0.715	0.736	0.708	0.777	1.786	1.764	1.76	1.751	1.746	1.743	1.753	1.742	1.757	1.767	1.789	1.788	1.773	1.77	1.754	1.759	1.748	1.728	1.745	1.748	1.756	1.758	1.787	1.79	0.955
t1020	0.725	0.691	0.676	0.665	0.699	0.673	0.702	0.715	0.71	0.715	0.73	0.76	0.782	0.685	0.658	0.671	0.704	0.725	0.726	0.706	0.716	0.736	0.709	0.776	1.786	1.763	1.761	1.75	1.746	1.743	1.753	1.742	1.756	1.767	1.789	1.787	1.773	1.771	1.754	1.76	1.748	1.727	1.745	1.748	1.757	1.757	1.788	1.79	0.954
t1025	0.725	0.691	0.676	0.665	0.699	0.673	0.702	0.715	0.71	0.713	0.73	0.759	0.782	0.685	0.658	0.67	0.705	0.725	0.725	0.705	0.715	0.737	0.708	0.776	1.787	1.764	1.76	1.75	1.747	1.745	1.753	1.742	1.756	1.766	1.789	1.788	1.773	1.771	1.754	1.759	1.748	1.728	1.745	1.747	1.756	1.757	1.787	1.791	0.955
t1030	0.725	0.691	0.675	0.665	0.699	0.673	0.702	0.714	0.71	0.714	0.73	0.759	0.782	0.685	0.658	0.669	0.705	0.725	0.725	0.705	0.715	0.735	0.708	0.776	1.787	1.764	1.76	1.751	1.746	1.744	1.753	1.743	1.756	1.766	1.789	1.789	1.774	1.771	1.755	1.759	1.749	1.728	1.746	1.748	1.758	1.757	1.787	1.791	0.956
t1035	0.724	0.69	0.675	0.664	0.699	0.673	0.701	0.714	0.709	0.713	0.73	0.759	0.78	0.685	0.657	0.671	0.703	0.726	0.725	0.705	0.714	0.736	0.708	0.776	1.787	1.764	1.761	1.75	1.747	1.743	1.753	1.743	1.756	1.767	1.789	1.789	1.774	1.772	1.755	1.76	1.749	1.728	1.746	1.749	1.757	1.758	1.786	1.791	0.957
t1040	0.724	0.691	0.675	0.664	0.699	0.672	0.702	0.714	0.71	0.714	0.729	0.759	0.78	0.685	0.658	0.67	0.704	0.726	0.725	0.705	0.714	0.736	0.707	0.776	1.787	1.764	1.761	1.75	1.747	1.743	1.753	1.742	1.756	1.766	1.788	1.789	1.774	1.771	1.756	1.76	1.749	1.729	1.746	1.748	1.757	1.757	1.787	1.792	0.957
t1045	0.724	0.69	0.675	0.663	0.698	0.673	0.701	0.714	0.709	0.713	0.729	0.758	0.78	0.685	0.658	0.67	0.703	0.726	0.725	0.705	0.714	0.735	0.706	0.775	1.787	1.764	1.761	1.751	1.747	1.744	1.753	1.743	1.757	1.767	1.789	1.789	1.774	1.771	1.756	1.76	1.749	1.728	1.745	1.748	1.757	1.758	1.786	1.792	0.958
t1050	0.724	0.69	0.674	0.664	0.698	0.672	0.701	0.714	0.709	0.713	0.729	0.758	0.779	0.684	0.657	0.67	0.702	0.724	0.725	0.704	0.714	0.736	0.707	0.774	1.787	1.764	1.761	1.751	1.747	1.743	1.753	1.743	1.757	1.766	1.789	1.788	1.774	1.772	1.756	1.76	1.749	1.728	1.745	1.748	1.757	1.757	1.786	1.79	0.958
t1055	0.724	0.69	0.674	0.664	0.698	0.672	0.701	0.714	0.709	0.713	0.729	0.758	0.779	0.684	0.657	0.67	0.703	0.725	0.724	0.704	0.714	0.736	0.707	0.775	1.788	1.765	1.761	1.751	1.747	1.743	1.753	1.743	1.756	1.766	1.789	1.788	1.774	1.772	1.756	1.76	1.749	1.728	1.746	1.748	1.757	1.758	1.787	1.791	0.958
t1060	0.723	0.69	0.673	0.665	0.698	0.672	0.7	0.713	0.709	0.713	0.729	0.758	0.779	0.684	0.658	0.669	0.702	0.725	0.725	0.704	0.713	0.735	0.707	0.775	1.787	1.765	1.761	1.751	1.748	1.744	1.753	1.742	1.756	1.766	1.789	1.789	1.774	1.772	1.756	1.76	1.75	1.729	1.746	1.748	1.758	1.756	1.788	1.792	0.959
t1065	0.722	0.689	0.673	0.663	0.697	0.671	0.7	0.712	0.708	0.713	0.728	0.757	0.78	0.684	0.657	0.668	0.701	0.724	0.723	0.704	0.713	0.735	0.707	0.775	1.787	1.765	1.761	1.751	1.747	1.744	1.753	1.744	1.756	1.766	1.789	1.789	1.775	1.772	1.756	1.76	1.75	1.729	1.746	1.747	1.757	1.758	1.788	1.792	0.959
t1070	0.722	0.689	0.673	0.663	0.697	0.672	0.701	0.712	0.709	0.713	0.729	0.757	0.779	0.684	0.657	0.669	0.702	0.724	0.723	0.704	0.713	0.736	0.707	0.774	1.788	1.764	1.761	1.752	1.747	1.743	1.753	1.744	1.756	1.766	1.789	1.789	1.775	1.772	1.756	1.76	1.75	1.728	1.745	1.748	1.757	1.758	1.787	1.791	0.959
t1075	0.722	0.688	0.673	0.663	0.697	0.672	0.7	0.712	0.708	0.711	0.728	0.757	0.779	0.684	0.657	0.669	0.703	0.723	0.725	0.704	0.713	0.734	0.706	0.773	1.787	1.765	1.761	1.751	1.748	1.743	1.753	1.744	1.756	1.766	1.789	1.789	1.774	1.772	1.756	1.76	1.75	1.729	1.746	1.748	1.757	1.758	1.787	1.791	0.96
t1080	0.722	0.688	0.672	0.663	0.696	0.671	0.699	0.713	0.708	0.711	0.728	0.757	0.779	0.684	0.657	0.669	0.702	0.724	0.723	0.704	0.712	0.733	0.707	0.774	1.788	1.765	1.761	1.752	1.748	1.744	1.753	1.743	1.756	1.767	1.789	1.789	1.774	1.772	1.756	1.76	1.75	1.728	1.746	1.747	1.758	1.757	1.787	1.792	0.96
t1085	0.721	0.688	0.673	0.662	0.697	0.671	0.699	0.713	0.707	0.711	0.728	0.757	0.78	0.683	0.656	0.669	0.701	0.723	0.723	0.704	0.713	0.735	0.706	0.773	1.788	1.765	1.762	1.751	1.748	1.744	1.754	1.744	1.756	1.766	1.79	1.79	1.775	1.772	1.756	1.761	1.75	1.728	1.746	1.747	1.757	1.759	1.787	1.791	0.96
t1090	0.722	0.688	0.672	0.662	0.696	0.671	0.699	0.713	0.708	0.712	0.728	0.756	0.778	0.683	0.657	0.669	0.702	0.724	0.724	0.703	0.712	0.735	0.706	0.773	1.788	1.765	1.761	1.752	1.748	1.744	1.754	1.744	1.756	1.766	1.79	1.79	1.775	1.772	1.755	1.761	1.749	1.728	1.745	1.747	1.757	1.758	1.788	1.792	0.961
t1095	0.722	0.688	0.672	0.662	0.696	0.67	0.699	0.712	0.708	0.712	0.728	0.757	0.778	0.683	0.657	0.669	0.702	0.723	0.723	0.704	0.712	0.735	0.706	0.773	1.788	1.765	1.761	1.752	1.748	1.744	1.753	1.743	1.756	1.768	1.789	1.789	1.775	1.773	1.756	1.761	1.75	1.728	1.746	1.748	1.757	1.759	1.787	1.791	0.961
t1100	0.721	0.688	0.672	0.661	0.695	0.67	0.698	0.712	0.707	0.712	0.728	0.757	0.778	0.682	0.656	0.669	0.702	0.723	0.723	0.704	0.712	0.734	0.706	0.772	1.788	1.765	1.762	1.752	1.748	1.745	1.754	1.743	1.756	1.767	1.789	1.789	1.776	1.773	1.757	1.761	1.75	1.728	1.746	1.748	1.757	1.759	1.788	1.792	0.961
t1105	0.72	0.687	0.671	0.662	0.696	0.671	0.698	0.712	0.707	0.711	0.727	0.756	0.779	0.682	0.656	0.669	0.701	0.723	0.723	0.703	0.712	0.734	0.706	0.772	1.788	1.765	1.762	1.752	1.748	1.745	1.754	1.744	1.756	1.767	1.79	1.789	1.775	1.773	1.757	1.762	1.749	1.728	1.746	1.748	1.758	1.759	1.788	1.792	0.963
t1110	0.72	0.687	0.671	0.661	0.695	0.67	0.698	0.711	0.706	0.711	0.727	0.756	0.778	0.682	0.655	0.668	0.701	0.723	0.722	0.703	0.712	0.734	0.706	0.772	1.788	1.765	1.762	1.752	1.748	1.745	1.753	1.743	1.756	1.766	1.79	1.789	1.775	1.772	1.756	1.761	1.749	1.728	1.746	1.748	1.757	1.758	1.788	1.791	0.964
t1115	0.72	0.687	0.671	0.661	0.695	0.67	0.698	0.711	0.707	0.711	0.728	0.756	0.779	0.682	0.655	0.668	0.7	0.722	0.723	0.703	0.711	0.734	0.706	0.772	1.788	1.765	1.762	1.752	1.748	1.744	1.753	1.743	1.757	1.767	1.79	1.79	1.776	1.773	1.757	1.761	1.75	1.728	1.746	1.747	1.757	1.758	1.788	1.792	0.963
t1120	0.72	0.687	0.671	0.661	0.695	0.669	0.698	0.711	0.707	0.71	0.727	0.755	0.778	0.682	0.656	0.669	0.701	0.722	0.723	0.703	0.711	0.733	0.705	0.772	1.789	1.765	1.762	1.752	1.748	1.745	1.753	1.743	1.757	1.767	1.789	1.789	1.776	1.773	1.757	1.762	1.75	1.728	1.745	1.748	1.757	1.759	1.788	1.791	0.964
t1125	0.72	0.687	0.671	0.661	0.694	0.669	0.697	0.711	0.706	0.712	0.727	0.755	0.778	0.682	0.656	0.668	0.7	0.722	0.722	0.702	0.711	0.732	0.706	0.772	1.789	1.766	1.762	1.752	1.749	1.745	1.754	1.743	1.757	1.766	1.789	1.789	1.777	1.773	1.757	1.761	1.75	1.728	1.746	1.748	1.758	1.759	1.787	1.792	0.964
t1130	0.719	0.687	0.67	0.661	0.694	0.669	0.698	0.711	0.706	0.71	0.727	0.754	0.777	0.682	0.655	0.669	0.701	0.722	0.722	0.703	0.711	0.733	0.705	0.771	1.789	1.765	1.762	1.752	1.748	1.744	1.753	1.743	1.757	1.766	1.789	1.79	1.776	1.773	1.756	1.761	1.749	1.728	1.746	1.748	1.757	1.758	1.788	1.793	0.964
t1135	0.72	0.687	0.67	0.66	0.694	0.669	0.698	0.711	0.706	0.71	0.727	0.754	0.777	0.681	0.656	0.668	0.701	0.722	0.722	0.703	0.711	0.732	0.705	0.771	1.789	1.766	1.762	1.752	1.749	1.744	1.753	1.742	1.757	1.767	1.79	1.79	1.776	1.773	1.757	1.761	1.751	1.729	1.746	1.748	1.758	1.757	1.788	1.792	0.966
t1140	0.719	0.687	0.67	0.66	0.694	0.669	0.697	0.71	0.706	0.71	0.727	0.753	0.777	0.681	0.655	0.667	0.701	0.723	0.722	0.702	0.71	0.73	0.704	0.771	1.789	1.766	1.762	1.751	1.748	1.745	1.754	1.743	1.757	1.768	1.79	1.79	1.776	1.773	1.756	1.761	1.75	1.728	1.746	1.748	1.757	1.758	1.787	1.792	0.966
t1145	0.718	0.686	0.67	0.66	0.694	0.67	0.697	0.71	0.705	0.71	0.726	0.753	0.777	0.681	0.655	0.668	0.701	0.721	0.721	0.703	0.71	0.732	0.705	0.77	1.789	1.766	1.762	1.752	1.748	1.745	1.754	1.743	1.757	1.766	1.79	1.788	1.776	1.774	1.757	1.761	1.75	1.729	1.745	1.748	1.758	1.758	1.787	1.792	0.967
t1150	0.718	0.686	0.67	0.66	0.694	0.669	0.697	0.71	0.705	0.71	0.726	0.754	0.776	0.682	0.655	0.667	0.7	0.721	0.72	0.702	0.71	0.733	0.705	0.77	1.789	1.766	1.762	1.752	1.748	1.745	1.754	1.743	1.758	1.767	1.79	1.79	1.776	1.774	1.757	1.762	1.75	1.728	1.745	1.747	1.757	1.758	1.788	1.793	0.968
t1155	0.719	0.686	0.67	0.661	0.694	0.669	0.697	0.71	0.705	0.71	0.726	0.753	0.776	0.681	0.654	0.667	0.699	0.72	0.721	0.702	0.711	0.732	0.705	0.77	1.789	1.766	1.762	1.752	1.749	1.745	1.754	1.743	1.758	1.766	1.79	1.79	1.776	1.774	1.757	1.761	1.75	1.728	1.745	1.748	1.758	1.759	1.787	1.791	0.969
t1160	0.717	0.684	0.669	0.66	0.694	0.668	0.697	0.71	0.704	0.709	0.726	0.752	0.776	0.681	0.655	0.666	0.7	0.72	0.722	0.703	0.71	0.732	0.705	0.77	1.789	1.766	1.762	1.752	1.748	1.745	1.754	1.743	1.759	1.767	1.79	1.79	1.776	1.774	1.757	1.761	1.75	1.729	1.745	1.749	1.758	1.759	1.787	1.792	0.97
t1165	0.717	0.685	0.669	0.659	0.693	0.668	0.696	0.71	0.704	0.71	0.726	0.752	0.776	0.681	0.654	0.666	0.699	0.72	0.721	0.702	0.71	0.732	0.705	0.77	1.789	1.765	1.762	1.752	1.748	1.745	1.754	1.742	1.758	1.767	1.79	1.79	1.777	1.774	1.757	1.761	1.75	1.728	1.745	1.749	1.758	1.759	1.787	1.791	0.97
t1170	0.717	0.684	0.668	0.659	0.693	0.668	0.696	0.71	0.704	0.71	0.726	0.752	0.776	0.681	0.655	0.668	0.699	0.721	0.722	0.702	0.708	0.731	0.704	0.77	1.79	1.766	1.762	1.752	1.748	1.745	1.754	1.743	1.758	1.766	1.79	1.791	1.776	1.774	1.757	1.761	1.75	1.729	1.745	1.748	1.758	1.759	1.787	1.791	0.971
t1175	0.717	0.685	0.668	0.66	0.693	0.668	0.696	0.709	0.704	0.71	0.725	0.752	0.775	0.681	0.654	0.667	0.698	0.72	0.721	0.702	0.709	0.731	0.704	0.769	1.79	1.766	1.762	1.752	1.749	1.745	1.754	1.744	1.759	1.767	1.791	1.79	1.776	1.774	1.757	1.761	1.75	1.729	1.746	1.747	1.758	1.758	1.787	1.792	0.972
t1180	0.717	0.684	0.668	0.66	0.692	0.667	0.695	0.71	0.704	0.711	0.725	0.752	0.775	0.68	0.654	0.666	0.698	0.719	0.72	0.701	0.709	0.732	0.704	0.769	1.79	1.766	1.763	1.753	1.748	1.745	1.754	1.743	1.759	1.766	1.791	1.791	1.777	1.774	1.757	1.761	1.751	1.729	1.746	1.748	1.759	1.76	1.788	1.791	0.973
t1185	0.717	0.685	0.669	0.659	0.694	0.668	0.695	0.71	0.704	0.709	0.724	0.752	0.775	0.68	0.653	0.667	0.698	0.721	0.72	0.702	0.708	0.73	0.704	0.769	1.79	1.766	1.763	1.752	1.748	1.744	1.754	1.743	1.759	1.766	1.79	1.79	1.777	1.774	1.758	1.761	1.751	1.729	1.745	1.748	1.758	1.759	1.787	1.792	0.973
t1190	0.716	0.684	0.668	0.659	0.692	0.667	0.695	0.709	0.703	0.708	0.724	0.752	0.775	0.679	0.653	0.666	0.698	0.721	0.72	0.701	0.709	0.73	0.705	0.769	1.79	1.766	1.763	1.753	1.748	1.744	1.754	1.743	1.759	1.767	1.79	1.79	1.777	1.774	1.757	1.762	1.751	1.729	1.746	1.748	1.759	1.758	1.787	1.793	0.974
t1195	0.716	0.684	0.668	0.659	0.692	0.667	0.695	0.709	0.703	0.708	0.724	0.751	0.775	0.679	0.653	0.664	0.697	0.72	0.72	0.701	0.709	0.73	0.704	0.768	1.79	1.766	1.763	1.753	1.749	1.744	1.754	1.743	1.759	1.765	1.791	1.789	1.776	1.775	1.757	1.761	1.75	1.729	1.746	1.748	1.758	1.759	1.787	1.792	0.975
t1200	0.717	0.684	0.668	0.659	0.692	0.667	0.695	0.709	0.703	0.709	0.725	0.751	0.774	0.68	0.653	0.666	0.698	0.719	0.72	0.701	0.709	0.731	0.704	0.768	1.79	1.766	1.762	1.753	1.749	1.744	1.754	1.743	1.76	1.766	1.79	1.79	1.777	1.774	1.758	1.762	1.751	1.729	1.746	1.749	1.758	1.759	1.787	1.792	0.975
t1205	0.716	0.684	0.667	0.659	0.692	0.667	0.695	0.709	0.703	0.708	0.723	0.75	0.774	0.679	0.652	0.666	0.698	0.719	0.72	0.701	0.708	0.73	0.704	0.768	1.79	1.766	1.763	1.752	1.748	1.745	1.754	1.742	1.758	1.766	1.79	1.791	1.777	1.775	1.757	1.762	1.751	1.729	1.746	1.748	1.758	1.759	1.787	1.792	0.976
t1210	0.715	0.683	0.667	0.658	0.691	0.667	0.695	0.708	0.703	0.708	0.724	0.751	0.774	0.679	0.652	0.666	0.697	0.72	0.719	0.701	0.709	0.73	0.704	0.768	1.79	1.766	1.763	1.752	1.749	1.744	1.754	1.743	1.759	1.766	1.789	1.791	1.777	1.775	1.757	1.762	1.751	1.729	1.746	1.748	1.757	1.759	1.787	1.791	0.976
t1215	0.716	0.684	0.667	0.658	0.691	0.667	0.695	0.709	0.703	0.708	0.724	0.751	0.774	0.679	0.652	0.666	0.697	0.721	0.72	0.7	0.708	0.73	0.703	0.768	1.79	1.766	1.763	1.752	1.748	1.745	1.754	1.743	1.759	1.765	1.79	1.791	1.777	1.775	1.757	1.762	1.75	1.729	1.746	1.748	1.757	1.758	1.786	1.792	0.977
t1220	0.715	0.683	0.666	0.658	0.691	0.666	0.694	0.709	0.703	0.709	0.724	0.751	0.774	0.678	0.651	0.665	0.697	0.719	0.719	0.701	0.708	0.73	0.704	0.768	1.79	1.766	1.763	1.752	1.748	1.745	1.753	1.743	1.759	1.766	1.79	1.789	1.777	1.775	1.758	1.762	1.75	1.729	1.746	1.748	1.758	1.758	1.786	1.792	0.977
t1225	0.715	0.683	0.667	0.658	0.69	0.666	0.694	0.709	0.702	0.708	0.723	0.751	0.774	0.678	0.651	0.665	0.697	0.719	0.72	0.701	0.708	0.728	0.703	0.766	1.791	1.767	1.763	1.752	1.748	1.745	1.754	1.743	1.759	1.766	1.791	1.791	1.778	1.775	1.758	1.762	1.751	1.73	1.745	1.748	1.758	1.758	1.787	1.792	0.979
t1230	0.715	0.683	0.666	0.658	0.691	0.666	0.694	0.709	0.703	0.707	0.722	0.75	0.773	0.678	0.652	0.664	0.697	0.72	0.72	0.701	0.708	0.729	0.703	0.767	1.791	1.767	1.762	1.753	1.748	1.745	1.754	1.743	1.759	1.766	1.79	1.791	1.778	1.775	1.757	1.761	1.751	1.729	1.746	1.748	1.757	1.759	1.787	1.792	0.978
t1235	0.714	0.683	0.666	0.658	0.691	0.667	0.694	0.708	0.702	0.708	0.724	0.75	0.773	0.678	0.652	0.666	0.698	0.721	0.72	0.701	0.707	0.73	0.703	0.767	1.79	1.766	1.763	1.752	1.748	1.745	1.753	1.743	1.758	1.766	1.789	1.791	1.778	1.775	1.757	1.761	1.75	1.729	1.745	1.747	1.758	1.759	1.788	1.791	0.98
t1240	0.715	0.682	0.666	0.657	0.691	0.667	0.693	0.708	0.702	0.708	0.722	0.749	0.773	0.678	0.651	0.665	0.697	0.719	0.719	0.7	0.707	0.729	0.703	0.767	1.791	1.767	1.763	1.753	1.748	1.745	1.754	1.743	1.758	1.765	1.789	1.79	1.778	1.775	1.757	1.761	1.75	1.729	1.745	1.748	1.757	1.758	1.786	1.791	0.981
t1245	0.714	0.682	0.666	0.657	0.69	0.666	0.695	0.708	0.702	0.707	0.722	0.749	0.773	0.678	0.651	0.665	0.697	0.719	0.719	0.7	0.707	0.729	0.702	0.767	1.79	1.767	1.763	1.752	1.748	1.746	1.753	1.743	1.759	1.765	1.789	1.791	1.778	1.776	1.758	1.762	1.751	1.729	1.745	1.748	1.757	1.758	1.787	1.792	0.981
t1250	0.714	0.682	0.666	0.657	0.691	0.666	0.694	0.707	0.701	0.707	0.722	0.749	0.773	0.677	0.652	0.665	0.697	0.72	0.719	0.7	0.707	0.728	0.702	0.767	1.791	1.767	1.763	1.752	1.749	1.746	1.754	1.743	1.759	1.765	1.79	1.79	1.778	1.775	1.757	1.761	1.75	1.73	1.746	1.748	1.758	1.758	1.787	1.792	0.982
t1255	0.714	0.682	0.665	0.657	0.69	0.666	0.693	0.707	0.701	0.707	0.722	0.748	0.772	0.678	0.651	0.664	0.697	0.719	0.719	0.7	0.707	0.728	0.702	0.767	1.791	1.767	1.762	1.753	1.748	1.745	1.754	1.743	1.759	1.766	1.791	1.791	1.778	1.775	1.758	1.761	1.75	1.729	1.745	1.748	1.758	1.758	1.788	1.792	0.982
t1260	0.713	0.682	0.665	0.657	0.69	0.666	0.693	0.708	0.701	0.706	0.722	0.747	0.772	0.677	0.651	0.664	0.696	0.718	0.718	0.7	0.707	0.729	0.702	0.767	1.791	1.767	1.763	1.753	1.748	1.746	1.754	1.742	1.757	1.765	1.79	1.791	1.778	1.776	1.758	1.761	1.751	1.73	1.746	1.748	1.758	1.759	1.786	1.791	0.984
t1265	0.714	0.682	0.665	0.656	0.69	0.666	0.693	0.707	0.702	0.707	0.721	0.748	0.773	0.677	0.651	0.663	0.696	0.718	0.717	0.7	0.706	0.729	0.702	0.766	1.791	1.766	1.763	1.752	1.749	1.746	1.753	1.743	1.759	1.766	1.79	1.792	1.778	1.775	1.758	1.762	1.751	1.729	1.746	1.748	1.758	1.759	1.788	1.792	0.983
t1270	0.713	0.682	0.665	0.657	0.689	0.666	0.694	0.707	0.701	0.708	0.722	0.748	0.772	0.677	0.651	0.665	0.696	0.718	0.718	0.7	0.706	0.728	0.703	0.767	1.791	1.767	1.763	1.752	1.749	1.746	1.755	1.743	1.759	1.766	1.791	1.792	1.778	1.776	1.758	1.761	1.751	1.73	1.745	1.748	1.758	1.759	1.788	1.791	0.984
t1275	0.712	0.681	0.664	0.657	0.69	0.666	0.693	0.706	0.701	0.708	0.722	0.748	0.772	0.677	0.652	0.665	0.696	0.719	0.718	0.699	0.706	0.728	0.701	0.767	1.791	1.767	1.763	1.752	1.748	1.746	1.754	1.743	1.758	1.765	1.79	1.792	1.778	1.775	1.758	1.762	1.752	1.73	1.746	1.748	1.758	1.758	1.788	1.791	0.985
t1280	0.713	0.682	0.665	0.657	0.69	0.665	0.694	0.706	0.701	0.707	0.721	0.748	0.772	0.677	0.651	0.665	0.695	0.718	0.718	0.699	0.706	0.727	0.702	0.767	1.791	1.766	1.763	1.752	1.749	1.746	1.755	1.744	1.759	1.766	1.79	1.79	1.778	1.775	1.758	1.761	1.752	1.73	1.745	1.748	1.758	1.759	1.788	1.791	0.986
t1285	0.713	0.682	0.665	0.657	0.69	0.666	0.694	0.706	0.701	0.706	0.721	0.749	0.772	0.677	0.65	0.664	0.695	0.718	0.719	0.699	0.706	0.727	0.701	0.766	1.791	1.767	1.763	1.752	1.749	1.746	1.754	1.743	1.758	1.766	1.791	1.792	1.778	1.775	1.758	1.761	1.752	1.73	1.746	1.748	1.759	1.758	1.787	1.792	0.987
t1290	0.713	0.681	0.665	0.657	0.69	0.665	0.693	0.706	0.701	0.707	0.721	0.748	0.771	0.677	0.651	0.664	0.695	0.719	0.717	0.699	0.706	0.727	0.7	0.765	1.791	1.767	1.763	1.752	1.749	1.746	1.754	1.744	1.759	1.765	1.791	1.791	1.778	1.776	1.758	1.761	1.752	1.73	1.746	1.748	1.759	1.758	1.789	1.791	0.989
t1295	0.712	0.681	0.664	0.656	0.69	0.665	0.693	0.706	0.701	0.707	0.721	0.747	0.771	0.677	0.65	0.663	0.694	0.719	0.717	0.698	0.707	0.728	0.701	0.766	1.791	1.767	1.763	1.753	1.749	1.746	1.754	1.744	1.758	1.765	1.79	1.791	1.779	1.776	1.758	1.761	1.753	1.73	1.745	1.748	1.758	1.758	1.787	1.793	0.99
t1300	0.711	0.681	0.663	0.656	0.691	0.665	0.694	0.706	0.701	0.706	0.72	0.746	0.771	0.677	0.65	0.663	0.696	0.717	0.718	0.698	0.705	0.727	0.7	0.764	1.791	1.767	1.763	1.753	1.748	1.747	1.754	1.744	1.758	1.765	1.79	1.792	1.779	1.776	1.759	1.762	1.753	1.73	1.745	1.748	1.758	1.759	1.787	1.793	0.99
t1305	0.711	0.681	0.664	0.656	0.689	0.665	0.693	0.705	0.7	0.707	0.721	0.747	0.772	0.677	0.65	0.664	0.695	0.718	0.718	0.699	0.705	0.727	0.7	0.764	1.791	1.767	1.763	1.752	1.749	1.746	1.754	1.744	1.758	1.766	1.79	1.792	1.778	1.776	1.758	1.761	1.752	1.73	1.746	1.748	1.758	1.759	1.787	1.793	0.992
t1310	0.712	0.681	0.664	0.655	0.689	0.664	0.692	0.706	0.7	0.707	0.721	0.746	0.772	0.676	0.649	0.662	0.694	0.717	0.716	0.698	0.707	0.727	0.701	0.765	1.791	1.767	1.764	1.752	1.748	1.747	1.754	1.744	1.759	1.766	1.791	1.792	1.779	1.776	1.758	1.761	1.753	1.73	1.746	1.748	1.757	1.758	1.787	1.792	0.992
t1315	0.712	0.681	0.664	0.655	0.69	0.665	0.693	0.705	0.7	0.706	0.72	0.746	0.771	0.677	0.65	0.663	0.695	0.718	0.717	0.698	0.705	0.726	0.7	0.765	1.792	1.767	1.764	1.753	1.749	1.747	1.754	1.744	1.759	1.766	1.79	1.792	1.779	1.776	1.758	1.762	1.752	1.73	1.746	1.748	1.758	1.758	1.787	1.792	0.994
t1320	0.712	0.68	0.663	0.655	0.689	0.664	0.693	0.705	0.7	0.706	0.72	0.746	0.771	0.677	0.65	0.663	0.696	0.718	0.717	0.697	0.705	0.726	0.7	0.765	1.792	1.767	1.764	1.753	1.749	1.747	1.754	1.745	1.759	1.766	1.79	1.792	1.779	1.776	1.759	1.763	1.752	1.731	1.746	1.749	1.758	1.759	1.786	1.792	0.994
t1325	0.711	0.68	0.663	0.655	0.689	0.664	0.693	0.705	0.699	0.706	0.719	0.745	0.77	0.677	0.65	0.662	0.695	0.718	0.718	0.698	0.705	0.724	0.698	0.764	1.791	1.768	1.764	1.753	1.749	1.746	1.754	1.744	1.759	1.765	1.791	1.791	1.778	1.776	1.759	1.761	1.752	1.731	1.746	1.748	1.758	1.759	1.788	1.791	0.994
t1330	0.71	0.68	0.663	0.654	0.689	0.663	0.692	0.705	0.701	0.706	0.721	0.746	0.77	0.676	0.65	0.662	0.694	0.718	0.718	0.697	0.705	0.727	0.7	0.765	1.791	1.768	1.764	1.752	1.749	1.747	1.754	1.744	1.758	1.766	1.789	1.793	1.778	1.776	1.758	1.762	1.752	1.73	1.746	1.748	1.758	1.759	1.787	1.792	0.996
t1335	0.709	0.68	0.663	0.654	0.689	0.664	0.692	0.705	0.699	0.705	0.72	0.746	0.77	0.676	0.649	0.662	0.694	0.717	0.717	0.697	0.705	0.726	0.7	0.764	1.792	1.768	1.764	1.753	1.748	1.747	1.754	1.744	1.758	1.765	1.79	1.791	1.779	1.777	1.759	1.762	1.752	1.731	1.746	1.748	1.758	1.759	1.787	1.791	0.996
t1340	0.71	0.68	0.663	0.654	0.69	0.665	0.693	0.705	0.7	0.706	0.72	0.746	0.77	0.676	0.649	0.662	0.694	0.717	0.716	0.696	0.705	0.726	0.7	0.765	1.792	1.768	1.763	1.752	1.748	1.747	1.754	1.745	1.758	1.765	1.789	1.79	1.779	1.776	1.759	1.762	1.753	1.731	1.746	1.748	1.757	1.76	1.786	1.792	0.997
t1345	0.71	0.679	0.663	0.653	0.689	0.664	0.692	0.705	0.699	0.705	0.719	0.745	0.77	0.676	0.65	0.661	0.694	0.716	0.717	0.696	0.704	0.726	0.699	0.764	1.792	1.768	1.764	1.753	1.748	1.747	1.754	1.745	1.759	1.766	1.791	1.79	1.779	1.777	1.759	1.762	1.752	1.732	1.746	1.749	1.758	1.759	1.787	1.792	0.997
t1350	0.709	0.679	0.663	0.655	0.689	0.664	0.693	0.705	0.699	0.704	0.719	0.745	0.77	0.676	0.649	0.661	0.694	0.717	0.716	0.697	0.704	0.726	0.699	0.763	1.792	1.768	1.763	1.753	1.748	1.748	1.754	1.745	1.758	1.766	1.791	1.791	1.779	1.776	1.758	1.762	1.752	1.731	1.746	1.748	1.758	1.76	1.788	1.793	0.999
[truncated: 47 more columns]
