# Supplementary material for: Guanidine hydrochloride reactivates an ancient septin hetero-oligomer assembly pathway in budding yeast
Source: eLife. 2020 Jan 28;9:e54355. doi: 10.7554/eLife.54355 (PMC7056273; doi:10.7554/eLife.54355)
Supplement: Figure 2—source data 1. [file elife-54355-fig2-data1.xlsx]

## Sheet: Figure 2C
No GdnHCl (green)	No GdnHCl (red)	5 mM GdnHCl (green)	5 mM GdnHCl (red)
8.38	69.7	-6.9	77.06
12.68	65.6	-4.9	78.4
11.16	56	-4.93	84.73
9.6	74.6	-1.64	66.96
9.15	73.2	-4.38	69.72
8.82	74.5	-6.29	53.05
10.22	72.3	-2.06	54.31
8.99	72.7	-7.41	54
13.22	76.3	-3.63	67.21
12.12	75.2	-4.04	73.25
9.17	74.9	-4.31	77.21
7.04	74.9	-2.67	60.35
10.47	74.2	-4.23	71.43
7.59	67.4	-3.38	81.4
5.81	71.4	-4.48	75.88
7.48	68.5	-3.62	66.01
10	76.1	-5.88	75.4
		-3.2	62.84
		-5.03	73.3
