# Supplementary material for: Guanidine hydrochloride reactivates an ancient septin hetero-oligomer assembly pathway in budding yeast
Source: eLife. 2020 Jan 28;9:e54355. doi: 10.7554/eLife.54355 (PMC7056273; doi:10.7554/eLife.54355)
Supplement: Figure 3—source data 1. [file elife-54355-fig3-data1.xlsx]

## Sheet: Figure 3A
no GdnHCl		with GdnHCl
mL	Abs280	mL	Abs280
38.43	699.66	42.14	717.49
38.45	699.59	42.17	717.77
38.48	699.62	42.2	717.99
38.5	699.66	42.23	718.25
38.53	699.54	42.26	718.63
38.56	699.61	42.29	719.02
38.58	699.63	42.32	719.24
38.61	699.64	42.35	719.72
38.64	699.71	42.38	720.25
38.66	699.69	42.41	720.68
38.69	699.7	42.44	721.23
38.71	699.62	42.48	721.85
38.74	699.56	42.51	722.4
38.77	699.56	42.54	723.01
38.79	699.75	42.57	723.65
38.82	699.74	42.6	724.43
38.84	699.69	42.63	725.2
38.87	699.57	42.66	726.22
38.9	699.58	42.69	727.1
38.92	699.62	42.72	727.88
38.95	699.73	42.75	728.98
38.97	699.7	42.78	730.27
39	699.67	42.81	731.4
39.03	699.64	42.84	732.76
39.05	699.69	42.87	733.91
39.08	699.5	42.9	735.48
39.1	699.62	42.93	737.08
39.13	699.64	42.96	738.64
39.16	699.65	42.99	740.4
39.18	699.77	43.02	742.4
39.21	699.76	43.05	744.29
39.23	699.8	43.08	746.53
39.26	699.72	43.11	748.5
39.29	699.79	43.14	751.02
39.31	699.89	43.17	753.68
39.34	699.93	43.2	755.99
39.36	699.99	43.23	759.07
39.39	699.95	43.26	761.94
39.42	699.89	43.3	764.99
39.44	700.09	43.33	768.72
39.47	700.16	43.36	771.71
39.49	700.27	43.39	775.51
39.52	700.31	43.42	779.64
39.55	700.33	43.45	783.3
39.57	700.45	43.48	787.64
39.6	700.49	43.51	791.75
39.62	700.54	43.54	796.74
39.65	700.66	43.57	801.83
39.68	700.72	43.6	806.56
39.7	700.91	43.63	812.19
39.73	701	43.66	818.28
39.75	701.18	43.69	823.36
39.78	701.34	43.72	829.85
39.81	701.53	43.75	835.38
39.83	701.76	43.78	842.24
39.86	701.97	43.81	849.55
39.89	702.2	43.84	855.47
39.91	702.53	43.87	863.42
39.94	702.72	43.9	870.61
39.96	702.95	43.93	877.71
39.99	703.27	43.96	886.36
40.02	703.54	43.99	893.4
40.04	703.97	44.02	902.16
40.07	704.36	44.05	911.01
40.09	704.69	44.08	918.82
40.12	705.21	44.12	927.75
40.15	705.71	44.15	936.5
40.17	706.07	44.18	945.55
40.2	706.6	44.21	954.93
40.22	707.28	44.24	963.33
40.25	707.81	44.27	973.09
40.28	708.58	44.3	983.35
40.3	709.19	44.33	991.63
40.33	709.92	44.36	1001.94
40.35	710.69	44.39	1010.9
40.38	711.51	44.42	1020.88
40.41	712.28	44.45	1031.26
40.43	713.08	44.48	1039.58
40.46	714.14	44.51	1050.08
40.48	715.07	44.54	1059.85
40.51	716.12	44.57	1068.98
40.54	717.36	44.6	1079.41
40.56	718.57	44.63	1087.96
40.59	719.73	44.66	1097.87
40.61	721.01	44.69	1107.66
40.64	722.33	44.72	1116.03
40.67	723.66	44.75	1125.37
40.69	725.25	44.78	1134.65
40.72	726.9	44.81	1143.22
40.74	728.23	44.84	1152.16
40.77	729.95	44.87	1159.63
40.8	731.67	44.91	1168.29
40.82	733.24	44.94	1177.25
40.85	735.32	44.97	1184.18
40.87	737.36	45	1192.59
40.9	739.11	45.03	1199.54
40.93	741.12	45.06	1207.45
40.95	743.31	45.09	1214.95
40.98	745.24	45.12	1221.11
41.01	747.66	45.15	1228.41
41.03	749.98	45.18	1235.18
41.06	752	45.21	1241.36
41.08	754.52	45.24	1248.16
41.11	757.15	45.27	1253.83
41.14	759.51	45.3	1260.05
41.16	762.13	45.33	1266.44
41.19	764.58	45.36	1272.11
41.21	767.31	45.39	1277.75
41.24	770.26	45.42	1283.5
41.27	772.96	45.45	1288.31
41.29	775.56	45.48	1294.15
41.32	778.81	45.51	1298.51
41.34	781.67	45.54	1304.16
41.37	784.42	45.57	1309.44
41.4	787.76	45.6	1313.76
41.42	790.95	45.63	1319.36
41.45	793.78	45.66	1324.29
41.47	797.15	45.69	1328.58
41.5	800.49	45.73	1333.94
41.53	803.14	45.76	1338.33
41.55	806.73	45.79	1343.92
41.58	810.25	45.82	1348.85
41.6	813.15	45.85	1353.37
41.63	816.73	45.88	1358
41.66	820.38	45.91	1362.74
41.68	823.3	45.94	1367.77
41.71	826.77	45.97	1373.61
41.73	830.74	46	1377.92
41.76	833.64	46.03	1383
41.79	837.3	46.06	1388.62
41.81	841.1	46.09	1393.19
41.84	844.04	46.12	1398.27
41.86	847.97	46.15	1402.45
41.89	851.71	46.18	1407.71
41.92	854.69	46.21	1412.9
41.94	858.43	46.24	1417.13
41.97	862.3	46.27	1421.93
41.99	865.42	46.3	1427.3
42.02	869.18	46.33	1432.01
42.05	873.02	46.36	1435
42.07	876.08	46.39	1439.6
42.1	879.98	46.42	1444.07
42.13	883.56	46.45	1448.62
42.15	886.76	46.48	1451.67
42.18	890.71	46.51	1455.43
42.2	894.48	46.55	1459.15
42.23	897.73	46.58	1461.95
42.26	901.42	46.61	1465.42
42.28	905.2	46.64	1467.95
42.31	908.67	46.67	1470.83
42.33	912.02	46.7	1473.36
42.36	915.79	46.73	1475.36
42.39	919.34	46.76	1477.18
42.41	922.79	46.79	1478.72
42.44	926.42	46.82	1480.35
42.46	929.94	46.85	1481.52
42.49	933.27	46.88	1481.84
42.52	937.42	46.91	1481.95
42.54	940.99	46.94	1482.59
42.57	943.93	46.97	1483.41
42.59	947.86	47	1482.72
42.62	951.62	47.03	1482.88
42.65	954.83	47.06	1481.46
42.67	958.61	47.09	1481.29
42.7	962.5	47.12	1480.1
42.72	965.35	47.15	1478.96
42.75	969.18	47.18	1477.31
42.78	973.13	47.21	1475.54
42.8	976.19	47.24	1473.93
42.83	980.34	47.27	1472.49
42.85	984.31	47.3	1469.99
42.88	987.57	47.33	1467.27
42.91	991.5	47.37	1465.2
42.93	995.64	47.4	1462.39
42.96	998.86	47.43	1460.01
42.98	1002.85	47.46	1457.51
43.01	1007.27	47.49	1454.8
43.04	1010.53	47.52	1451.54
43.06	1015.11	47.55	1448.64
43.09	1019.34	47.58	1445.85
43.11	1022.97	47.61	1443.37
43.14	1027.53	47.64	1439.78
43.17	1032.02	47.67	1436.68
43.19	1035.95	47.7	1433.7
43.22	1040.85	47.73	1430.12
43.24	1045.66	47.76	1427.3
43.27	1049.68	47.79	1423.92
43.3	1054.91	47.82	1420.4
43.32	1060.24	47.85	1417.61
43.35	1064.89	47.88	1414.34
43.38	1070.48	47.91	1411.62
43.4	1075.98	47.94	1408.92
43.43	1081.22	47.97	1405.44
43.45	1087.05	48	1403.04
43.48	1093.4	48.03	1399.69
43.51	1099.39	48.06	1397.16
43.53	1105.5	48.09	1394.14
43.56	1112.54	48.12	1391.26
43.58	1119	48.15	1388.8
43.61	1125.47	48.19	1385.61
43.64	1132.99	48.22	1382.8
43.66	1140.75	48.25	1379.79
43.69	1147.83	48.28	1377.46
43.71	1155.95	48.31	1375.27
43.74	1164.61	48.34	1373.06
43.77	1172.05	48.37	1370.38
43.79	1181.42	48.4	1367.74
43.82	1190.25	48.43	1365.46
43.84	1198.51	48.46	1362.91
43.87	1208.77	48.49	1360.73
43.9	1219.05	48.52	1358.57
43.92	1227.79	48.55	1356.62
43.95	1238.06	48.58	1354.28
43.97	1249.8	48.61	1352.4
44	1258.87	48.64	1350.4
44.03	1270.61	48.67	1348.06
44.05	1282.86	48.7	1346.48
44.08	1292.6	48.73	1344.51
44.1	1305.8	48.76	1341.94
44.13	1318.5	48.79	1340.31
44.16	1329.23	48.82	1338.79
44.18	1342.21	48.85	1336.8
44.21	1356.19	48.88	1335.05
44.23	1367.56	48.91	1333.57
44.26	1381.29	48.94	1331.84
44.29	1394.96	48.97	1330.4
44.31	1406.02	49.01	1328.56
44.34	1420.76	49.04	1327.2
44.36	1435.03	49.07	1325.68
44.39	1447.27	49.1	1324.09
44.42	1462.09	49.13	1322.47
44.44	1476.16	49.16	1320.81
44.47	1489.05	49.19	1319.99
44.5	1503.4	49.22	1318.35
44.52	1518.71	49.25	1317.02
44.55	1530.85	49.28	1315.75
44.57	1545.15	49.31	1314.05
44.6	1559.29	49.34	1312.92
44.63	1572.49	49.37	1311.73
44.65	1586.4	49.4	1310.63
44.68	1601.41	49.43	1309.47
44.7	1614.94	49.46	1308.11
44.73	1627.45	49.49	1306.5
44.76	1641.8	49.52	1305.82
44.78	1654.65	49.55	1304.31
44.81	1665.34	49.58	1303.05
44.83	1679.16	49.61	1302.34
44.86	1692.37	49.64	1300.96
44.89	1704.29	49.67	1299.99
44.91	1717.34	49.7	1298.62
44.94	1729.7	49.73	1297.82
44.96	1740.34	49.76	1296.79
44.99	1751.79	49.79	1295.76
45.02	1764.53	49.83	1295.07
45.04	1774.6	49.86	1293.85
45.07	1785.75	49.89	1292.97
45.09	1796.92	49.92	1291.67
45.12	1806.37	49.95	1291.05
45.15	1816.11	49.98	1290.01
45.17	1827.12	50.01	1288.95
45.2	1834.92	50.04	1287.97
45.22	1845.58	50.07	1286.86
45.25	1855.35	50.1	1286.19
45.28	1863.7	50.13	1285.29
45.3	1871.44	50.16	1284.43
45.33	1879.37	50.19	1283.32
45.35	1885.07	50.22	1282.43
45.38	1893.51	50.25	1281.8
45.41	1902.62	50.28	1280.61
45.43	1908.71	50.31	1280.09
45.46	1915.84	50.34	1279.01
45.48	1924.03	50.37	1278.39
45.51	1929.62	50.4	1277.16
45.54	1934.31	50.43	1276.51
45.56	1941.11	50.46	1275.62
45.59	1947.03	50.49	1274.98
45.62	1952.22	50.52	1274.29
45.64	1956.86	50.55	1273.21
45.67	1961.48	50.58	1272.58
45.69	1966.4	50.61	1271.73
45.72	1969.53	50.65	1270.79
45.75	1974.06	50.68	1270.03
45.77	1978.06	50.71	1269.53
45.8	1982.17	50.74	1268.49
45.82	1985.72	50.77	1267.57
45.85	1989.31	50.8	1266.92
45.88	1992.14	50.83	1266.11
45.9	1994.26	50.86	1265.15
45.93	1994.88	50.89	1264.49
45.95	1996.29	50.92	1263.36
45.98	1999.84	50.95	1262.76
46.01	2000.46	50.98	1261.81
46.03	2002.64	51.01	1260.76
46.06	2004.7	51.04	1260.21
46.08	2004.85	51.07	1259.32
46.11	2005.9	51.1	1258.15
46.14	2006.37	51.13	1257.53
46.16	2006.47	51.16	1256.84
46.19	2006.7	51.19	1256.08
46.21	2005.51	51.22	1255.26
46.24	2005.63	51.25	1254.48
46.27	2005.98	51.28	1253.95
46.29	2005.03	51.31	1252.95
46.32	2003.9	51.34	1252.13
46.34	2003.16	51.37	1251.43
46.37	2001.96	51.4	1250.32
46.4	2000.42	51.43	1249.48
46.42	1999.46	51.47	1248.39
46.45	1996.13	51.5	1247.79
46.47	1994.2	51.53	1247.24
46.5	1993.09	51.56	1245.85
46.53	1991.14	51.59	1245.43
46.55	1987.97	51.62	1244.6
46.58	1984.58	51.65	1243.3
46.6	1980.38	51.68	1242.4
46.63	1979.7	51.71	1241.59
46.66	1977.69	51.74	1240.7
46.68	1974.4	51.77	1239.59
46.71	1971.66	51.8	1239.03
46.74	1966.94	51.83	1238.14
46.76	1963.55	51.86	1237.12
46.79	1959.94	51.89	1236.32
46.81	1954.68	51.92	1235.6
46.84	1951.41	51.95	1234.68
46.87	1947.48	51.98	1233.43
46.89	1943.74	52.01	1232.56
46.92	1938.4	52.04	1231.98
46.94	1934.9	52.07	1230.98
46.97	1930.86	52.1	1230.1
47	1924.89	52.13	1229.11
47.02	1921.29	52.16	1228.27
47.05	1915.7	52.19	1227.31
47.07	1911.34	52.22	1226.22
47.1	1905.62	52.26	1225.34
47.13	1900.26	52.29	1224.34
47.15	1895.84	52.32	1223.58
47.18	1889.94	52.35	1222.37
47.2	1884.04	52.38	1221.41
47.23	1879.84	52.41	1220.48
47.26	1873.72	52.44	1219.46
47.28	1870.25	52.47	1218.37
47.31	1865.65	52.5	1217.42
47.33	1859.64	52.53	1216.61
47.36	1854.7	52.56	1215.89
47.39	1848.52	52.59	1214.75
47.41	1843.25	52.62	1213.72
47.44	1838.74	52.65	1212.54
47.46	1833.15	52.68	1211.68
47.49	1827.59	52.71	1210.91
47.52	1822.77	52.74	1209.89
47.54	1816.68	52.77	1209.06
47.57	1810.79	52.8	1208.47
47.59	1806.21	52.83	1207.23
47.62	1798.94	52.86	1206.37
47.65	1793.8	52.89	1205.5
47.67	1789.19	52.92	1204.23
47.7	1782.89	52.95	1203.35
47.72	1777.56	52.98	1202.34
47.75	1773.73	53.01	1201.56
47.78	1767.84	53.04	1200.64
47.8	1762.2	53.08	1199.5
47.83	1757.15	53.11	1198.69
47.85	1749.32	53.14	1197.92
47.88	1744.94	53.17	1196.92
47.91	1740.85	53.2	1195.94
47.93	1736.33	53.23	1195.06
47.96	1730.14	53.26	1194.05
47.99	1725.35	53.29	1193.21
48.01	1720.61	53.32	1192.5
48.04	1715.82	53.35	1191.68
48.06	1710.89	53.38	1190.71
48.09	1704.72	53.41	1189.95
48.12	1699.79	53.44	1188.83
48.14	1695.09	53.47	1187.92
48.17	1691.03	53.5	1187.07
48.19	1684.89	53.53	1186.46
48.22	1679.47	53.56	1185.96
48.25	1676.42	53.59	1185.36
48.27	1671.56	53.62	1184.48
48.3	1665.84	53.65	1183.34
48.32	1660.79	53.68	1182.88
48.35	1656.56	53.71	1181.83
48.38	1652.16	53.74	1181.49
48.4	1648.11	53.77	1180.86
48.43	1643.49	53.8	1180.04
48.45	1638.48	53.83	1179.22
48.48	1634.38	53.86	1178.66
48.51	1629.72	53.9	1178.1
48.53	1624.29	53.93	1177.4
48.56	1621.41	53.96	1176.56
48.58	1617.1	53.99	1176.29
48.61	1612.81	54.02	1175.51
48.64	1608.79	54.05	1174.55
48.66	1604.87	54.08	1174.41
48.69	1600.31	54.11	1173.58
48.71	1596.97	54.14	1173.25
48.74	1592.54	54.17	1172.92
48.77	1587.82	54.2	1172.38
48.79	1584.45	54.23	1172.21
48.82	1580.06	54.26	1171.39
48.84	1575.9	54.29	1170.9
48.87	1572.72	54.32	1170.71
48.9	1568.76	54.35	1170.13
48.92	1564.7	54.38	1169.92
48.95	1561.6	54.41	1169.52
48.97	1558.14	54.44	1169.37
49	1553.17	54.47	1168.85
49.03	1549.51	54.5	1168.48
49.05	1546.54	54.53	1168.09
49.08	1542.56	54.56	1167.83
49.11	1539.04	54.59	1167.86
49.13	1535.1	54.62	1167.6
49.16	1531.94	54.65	1167.38
49.18	1528.9	54.68	1166.96
49.21	1525.35	54.72	1167.03
49.24	1521	54.75	1166.95
49.26	1517.59	54.78	1166.71
49.29	1514.32	54.81	1166.49
49.31	1510.92	54.84	1166.25
49.34	1506.64	54.87	1166.41
49.37	1503.71	54.9	1166.62
49.39	1500.58	54.93	1166.17
49.42	1497.49	54.96	1165.97
49.44	1494.24	54.99	1166.21
49.47	1491.07	55.02	1166.09
49.5	1487.5	55.05	1166.3
49.52	1484.54	55.08	1165.93
49.55	1481.25	55.11	1166.08
49.57	1477.86	55.14	1166.52
49.6	1474.89	55.17	1166.42
49.63	1472.49	55.2	1166.52
49.65	1468.58	55.23	1166.86
49.68	1465.21	55.26	1166.97
49.7	1461.74	55.29	1166.68
49.73	1459.25	55.32	1166.91
49.76	1456.55	55.35	1167.18
49.78	1452.44	55.38	1167.36
49.81	1449.54	55.41	1167.74
49.83	1446.65	55.44	1167.77
49.86	1443.46	55.47	1168.15
49.89	1440.88	55.5	1168.38
49.91	1438.68	55.54	1168.43
49.94	1435.91	55.57	1168.73
49.96	1432.37	55.6	1168.84
49.99	1429.27	55.63	1169.35
50.02	1425.96	55.66	1169.75
50.04	1422.88	55.69	1169.67
50.07	1420.46	55.72	1169.81
50.09	1417.68	55.75	1170.59
50.12	1415.16	55.78	1170.84
50.15	1412.6	55.81	1171.06
50.17	1409.89	55.84	1171.02
50.2	1406.81	55.87	1171.55
50.23	1404.08	55.9	1171.95
50.25	1401.22	55.93	1171.99
50.28	1398.18	55.96	1172.46
50.3	1395.09	55.99	1172.67
50.33	1392.85	56.02	1172.78
50.36	1390.08	56.05	1173.28
50.38	1387.31	56.08	1173.57
50.41	1384.55	56.11	1173.89
50.43	1381.77	56.14	1174.3
50.46	1379.18	56.17	1174.42
50.49	1376.88	56.2	1174.71
50.51	1373.75	56.23	1174.87
50.54	1371.16	56.26	1175.4
50.56	1368.76	56.29	1175.54
50.59	1366.24	56.32	1176.08
50.62	1363.25	56.36	1176.21
50.64	1361.42	56.39	1176.43
50.67	1358.99	56.42	1176.6
50.69	1356.44	56.45	1177.06
50.72	1354.01	56.48	1177.32
50.75	1351.47	56.51	1177.5
50.77	1348.78	56.54	1177.83
50.8	1346.31	56.57	1177.96
50.82	1343.53	56.6	1178.12
50.85	1340.92	56.63	1178.19
50.88	1338.87	56.66	1178.22
50.9	1335.88	56.69	1178.54
50.93	1333.42	56.72	1178.8
50.95	1331.38	56.75	1178.87
50.98	1328.86	56.78	1179.04
51.01	1326.34	56.81	1179.5
51.03	1324.26	56.84	1179.63
51.06	1321.04	56.87	1179.74
51.08	1319.03	56.9	1179.45
51.11	1317.22	56.93	1179.53
51.14	1314.76	56.96	1179.62
51.16	1311.78	56.99	1179.56
51.19	1309.73	57.02	1179.7
51.21	1307.72	57.05	1179.74
51.24	1305.06	57.08	1179.7
51.27	1302.99	57.11	1179.72
51.29	1300.79	57.14	1179.58
51.32	1298.35	57.18	1179.51
51.34	1295.9	57.21	1179.54
51.37	1293.38	57.24	1179.45
51.4	1291.52	57.27	1179.11
51.42	1289.4	57.3	1179
51.45	1287.59	57.33	1178.64
51.48	1284.61	57.36	1178.71
51.5	1282.3	57.39	1178.4
51.53	1280.26	57.42	1178.03
51.55	1278.25	57.45	1177.88
51.58	1276.37	57.48	1177.6
51.61	1274.26	57.51	1177.42
51.63	1271.48	57.54	1176.76
51.66	1269.47	57.57	1176.78
51.68	1267.36	57.6	1175.97
51.71	1265.45	57.63	1175.6
51.74	1263.07	57.66	1175.28
51.76	1261.63	57.69	1174.82
51.79	1258.95	57.72	1174.36
51.81	1256.93	57.75	1173.84
51.84	1255.08	57.78	1173.35
51.87	1252.51	57.81	1172.8
51.89	1249.98	57.84	1172.16
51.92	1248.53	57.87	1171.73
51.94	1246.48	57.9	1171.1
51.97	1244.62	57.93	1170.42
52	1243.09	57.96	1169.62
52.02	1240.78	58	1168.88
52.05	1239.04	58.03	1168.17
52.07	1237.33	58.06	1167.32
52.1	1235.15	58.09	1166.62
52.13	1232.85	58.12	1165.64
52.15	1231.21	58.15	1165.04
52.18	1229.22	58.18	1164
52.2	1227.44	58.21	1162.97
52.23	1226.14	58.24	1162.5
52.26	1224.2	58.27	1161.38
52.28	1222.04	58.3	1160.26
52.31	1220.21	58.33	1159.14
52.33	1218.73	58.36	1158.34
52.36	1216.85	58.39	1157.4
52.39	1214.74	58.42	1156.38
52.41	1213.05	58.45	1155.36
52.44	1210.85	58.48	1154.45
52.46	1209.35	58.51	1153.29
52.49	1208.13	58.54	1152.33
52.52	1206.23	58.57	1151
52.54	1204.57	58.6	1149.7
52.57	1203.14	58.63	1148.19
52.6	1201.35	58.66	1146.99
52.62	1199.74	58.69	1145.54
52.65	1198.3	58.72	1144.51
52.67	1196.49	58.75	1143.15
52.7	1194.83	58.79	1141.95
52.73	1193.28	58.82	1140.68
52.75	1191.78	58.85	1139.06
52.78	1190.25	58.88	1137.76
52.8	1189.2	58.91	1136.21
52.83	1187.53	58.94	1134.67
52.86	1185.71	58.97	1133.24
52.88	1184.49	59	1131.85
52.91	1182.97	59.03	1130.43
52.93	1181.45	59.06	1128.85
52.96	1180.16	59.09	1127.17
52.99	1178.71	59.12	1125.82
53.01	1177.34	59.15	1124.13
53.04	1176.34	59.18	1122.61
53.06	1174.87	59.21	1121.19
53.09	1173.75	59.24	1119.47
53.12	1172.68	59.27	1117.82
53.14	1171.31	59.3	1115.91
53.17	1170.25	59.33	1114.26
53.19	1169.41	59.36	1112.94
53.22	1168.17	59.39	1111.06
53.25	1166.7	59.42	1109.23
53.27	1165.8	59.45	1107.7
53.3	1164.86	59.48	1106.05
53.32	1164.05	59.51	1104.29
53.35	1163.05	59.54	1102.61
53.38	1162.07	59.57	1100.57
53.4	1161.36	59.61	1098.91
53.43	1160.49	59.64	1096.91
53.45	1159.76	59.67	1095.28
53.48	1159.11	59.7	1093.43
53.51	1158.48	59.73	1091.45
53.53	1157.99	59.76	1090.1
53.56	1157.02	59.79	1087.84
53.58	1156.61	59.82	1086.07
53.61	1156.16	59.85	1084.39
53.64	1155.41	59.88	1082.45
53.66	1155.12	59.91	1080.59
53.69	1154.82	59.94	1078.35
53.72	1154.13	59.97	1076.56
53.74	1153.45	60	1074.78
53.77	1153.25	60.03	1072.59
53.79	1153.6	60.06	1070.52
53.82	1153.12	60.09	1069.06
53.85	1153.04	60.12	1066.99
53.87	1152.65	60.15	1065.34
53.9	1152.58	60.18	1063.08
53.92	1152.96	60.21	1061.34
53.95	1153.18	60.24	1059.59
53.98	1153.02	60.27	1057.46
54	1153.56	60.3	1055.37
54.03	1153.79	60.33	1053.53
54.05	1154.16	60.36	1051.71
54.08	1154.44	60.39	1049.99
54.11	1154.68	60.43	1047.92
54.13	1154.93	60.46	1045.99
54.16	1155.37	60.49	1043.91
54.18	1156.21	60.52	1042.17
54.21	1157.08	60.55	1040.26
54.24	1157.72	60.58	1038.14
54.26	1158.46	60.61	1036.19
54.29	1159.43	60.64	1034.5
54.31	1160.5	60.67	1032.47
54.34	1161.8	60.7	1030.45
54.37	1162.69	60.73	1028.92
54.39	1163.64	60.76	1026.69
54.42	1165.07	60.79	1025.18
54.44	1166.57	60.82	1023.1
54.47	1167.64	60.85	1021
54.5	1169.31	60.88	1019.32
54.52	1171.11	60.91	1017.4
54.55	1172.42	60.94	1015.41
54.57	1174.03	60.97	1013.58
54.6	1175.64	61	1011.77
54.63	1177.62	61.03	1010.18
54.65	1179.81	61.06	1008.21
54.68	1182.05	61.09	1006.26
54.7	1183.98	61.12	1004.38
54.73	1185.91	61.15	1002.67
54.76	1187.88	61.18	1000.84
54.78	1190.22	61.21	999.21
54.81	1192.42	61.25	997.2
54.83	1195.02	61.28	995.57
54.86	1197.74	61.31	993.8
54.89	1199.98	61.34	991.85
54.91	1203.18	61.37	990.34
54.94	1205.74	61.4	988.31
54.97	1208.06	61.43	986.75
54.99	1210.95	61.46	984.98
55.02	1213.71	61.49	983.24
55.04	1216.35	61.52	981.71
55.07	1219.44	61.55	979.97
55.1	1222.74	61.58	978.24
55.12	1225.85	61.61	976.62
55.15	1229.29	61.64	974.84
55.17	1233.04	61.67	973.26
55.2	1236.01	61.7	971.79
55.23	1239.27	61.73	970.02
55.25	1242.84	61.76	968.61
55.28	1245.79	61.79	966.93
55.3	1249.21	61.82	965.33
55.33	1253.06	61.85	963.99
55.36	1256.38	61.88	962.19
55.38	1260.45	61.91	960.94
55.41	1264.68	61.94	959.22
55.43	1267.46	61.97	957.57
55.46	1271.43	62	956.44
55.49	1275.29	62.03	954.61
55.51	1278.58	62.07	953.35
55.54	1283.09	62.1	951.79
55.56	1286.91	62.13	950.4
55.59	1289.83	62.16	949.09
55.62	1293.95	62.19	947.54
55.64	1298.05	62.22	946.02
55.67	1301.32	62.25	944.71
55.69	1305.34	62.28	943.42
55.72	1309.75	62.31	942.31
55.75	1313.4	62.34	940.96
55.77	1317.56	62.37	939.39
55.8	1321.62	62.4	938.34
55.82	1325.35	62.43	936.97
55.85	1329.18	62.46	935.67
55.88	1333.41	62.49	934.57
55.9	1337.16	62.52	933.12
55.93	1340.46	62.55	932.15
55.95	1344.7	62.58	930.9
55.98	1349.24	62.61	929.67
56.01	1352.32	62.64	928.72
56.03	1356.12	62.67	927.15
56.06	1360.09	62.7	926.17
56.09	1362.95	62.73	925.34
56.11	1367.24	62.76	924.07
56.14	1371.41	62.79	923.1
56.16	1374.39	62.82	922.14
56.19	1378.42	62.85	920.96
56.22	1382.21	62.89	920.05
56.24	1385.39	62.92	918.9
56.27	1388.83	62.95	917.83
56.29	1392.59	62.98	917.19
56.32	1395.81	63.01	916.18
56.35	1399.15	63.04	915.46
56.37	1402.85	63.07	914.43
56.4	1406.06	63.1	913.58
56.42	1409.05	63.13	912.67
56.45	1412.8	63.16	911.95
56.48	1415.71	63.19	911.33
56.5	1418.73	63.22	910.36
56.53	1421.62	63.25	909.72
56.55	1423.98	63.28	909.09
56.58	1427.29	63.31	908.36
56.61	1430.47	63.34	907.65
56.63	1432.38	63.37	907.21
56.66	1435.48	63.4	906.49
56.68	1438.51	63.43	906.05
56.71	1440.3	63.46	905.33
56.74	1442.79	63.49	904.78
56.76	1445.63	63.52	904.29
56.79	1447.82	63.55	903.79
56.81	1450.28	63.58	903.34
56.84	1452.6	63.61	902.88
56.87	1454.73	63.64	902.45
56.89	1456.85	63.67	902
56.92	1458.86	63.71	901.65
56.94	1460.86	63.74	901.24
56.97	1463.22	63.77	900.82
57	1465.34	63.8	900.58
57.02	1466.79	63.83	900.33
57.05	1468.44	63.86	900.1
57.07	1470.25	63.89	899.74
57.1	1471.64	63.92	899.5
57.13	1472.64	63.95	899.23
57.15	1474.26	63.98	898.9
57.18	1475.98	64.01	898.75
57.21	1477.28	64.04	898.56
57.23	1478.46	64.07	898.28
57.26	1479.28	64.1	898.2
57.28	1480.03	64.13	898.02
57.31	1481.06	64.16	897.85
57.34	1482.34	64.19	897.71
57.36	1483.15	64.22	897.64
57.39	1484.39	64.25	897.64
57.41	1485.08	64.28	897.57
57.44	1485.5	64.31	897.67
57.47	1485.6	64.34	897.68
57.49	1486.19	64.37	897.59
57.52	1486.34	64.4	897.4
57.54	1486.81	64.43	897.35
57.57	1487.09	64.46	897.45
57.6	1487.07	64.49	897.49
57.62	1487.31	64.53	897.56
57.65	1487.31	64.56	897.6
57.67	1486.82	64.59	897.58
57.7	1486.86	64.62	897.62
57.73	1487.23	64.65	897.67
57.75	1486.79	64.68	897.63
57.78	1486.25	64.71	897.97
57.8	1486.18	64.74	898
57.83	1485.97	64.77	898.03
57.86	1485.53	64.8	898.26
57.88	1484.7	64.83	898.29
57.91	1484.39	64.86	898.61
57.93	1483.48	64.89	898.72
57.96	1483.34	64.92	898.75
57.99	1482.41	64.95	898.87
58.01	1481.29	64.98	899.17
58.04	1480.52	65.01	899.29
58.06	1479.52	65.04	899.62
58.09	1478.83	65.07	899.81
58.12	1477.15	65.1	900.09
58.14	1476.59	65.13	900.06
58.17	1475.8	65.16	900.38
58.19	1473.95	65.19	900.69
58.22	1472.64	65.22	900.86
58.25	1471.49	65.25	900.9
58.27	1470.06	65.28	901.15
58.3	1468.5	65.31	901.21
58.33	1467.04	65.35	901.74
58.35	1465.78	65.38	901.92
58.38	1464.58	65.41	902.1
58.4	1462.84	65.44	902.51
58.43	1460.83	65.47	902.59
58.46	1459.12	65.5	903.04
58.48	1457.62	65.53	903.2
58.51	1455.41	65.56	903.57
58.53	1453.75	65.59	903.83
58.56	1451.95	65.62	903.97
58.59	1450.33	65.65	904.25
58.61	1448.27	65.68	904.53
58.64	1446.75	65.71	904.91
58.66	1444.24	65.74	905.15
58.69	1442.06	65.77	905.57
58.72	1440.2	65.8	905.77
58.74	1437.89	65.83	906.07
58.77	1435.81	65.86	906.36
58.79	1433.87	65.89	906.64
58.82	1431.48	65.92	906.88
58.85	1428.94	65.95	907.38
58.87	1426.96	65.98	907.57
58.9	1424.78	66.01	907.84
58.92	1422.34	66.04	908.22
58.95	1420.28	66.07	908.51
58.98	1417.25	66.1	908.89
59	1414.94	66.14	909.23
59.03	1412.68	66.17	909.58
59.05	1410.05	66.2	909.95
59.08	1407.2	66.23	910.29
59.11	1404.86	66.26	910.45
59.13	1402.56	66.29	910.88
59.16	1399.65	66.32	911.27
59.18	1397.15	66.35	911.59
59.21	1394.71	66.38	911.91
59.24	1392.07	66.41	912.3
59.26	1389.65	66.44	912.59
59.29	1386.98	66.47	912.82
59.31	1383.65	66.5	913.21
59.34	1380.59	66.53	913.6
59.37	1378.57	66.56	913.85
59.39	1375.57	66.59	914.28
59.42	1372.7	66.62	914.71
59.44	1370.45	66.65	915.01
59.47	1367.33	66.68	915.41
59.5	1364.12	66.71	915.72
59.52	1361.58	66.74	916.06
59.55	1358.57	66.77	916.5
59.58	1355.91	66.8	916.84
59.6	1353.88	66.83	917.13
59.63	1350.48	66.86	917.47
59.65	1347.43	66.89	917.61
59.68	1344.96	66.92	918.27
59.71	1342.12	66.96	918.51
59.73	1338.94	66.99	918.66
59.76	1336.15	67.02	919.21
59.78	1333.1	67.05	919.52
59.81	1330.08	67.08	919.92
59.84	1327.75	67.11	920.11
59.86	1324.3	67.14	920.41
59.89	1321.21	67.17	920.86
59.91	1318.96	67.2	921.22
59.94	1315.55	67.23	921.51
59.97	1312.57	67.26	921.95
59.99	1309.92	67.29	922.26
60.02	1306.78	67.32	922.58
60.04	1303.96	67.35	923.06
60.07	1301.13	67.38	923.33
60.1	1297.97	67.41	923.67
60.12	1294.93	67.44	924.02
60.15	1292.51	67.47	924.47
60.17	1289.07	67.5	924.58
60.2	1285.85	67.53	924.96
60.23	1283.19	67.56	925.4
60.25	1280.26	67.59	925.61
60.28	1277.28	67.62	925.98
60.3	1274.5	67.65	926.27
60.33	1271.6	67.68	926.66
60.36	1268.38	67.71	926.97
60.38	1265.33	67.74	927.19
60.41	1262.63	67.78	927.52
60.43	1259.25	67.81	927.81
60.46	1256.51	67.84	927.98
60.49	1253.96	67.87	928.21
60.51	1250.77	67.9	928.7
60.54	1247.56	67.93	928.94
60.56	1245.13	67.96	929.19
60.59	1242.02	67.99	929.54
60.62	1239.03	68.02	929.89
60.64	1236.7	68.05	930.23
60.67	1233.87	68.08	930.4
60.7	1230.89	68.11	930.76
60.72	1228.23	68.14	930.9
60.75	1225.26	68.17	931.21
60.77	1222.28	68.2	931.5
60.8	1219.78	68.23	931.87
60.83	1217.05	68.26	932.09
60.85	1213.85	68.29	932.27
60.88	1211.76	68.32	932.53
60.9	1208.61	68.35	932.71
60.93	1205.52	68.38	933.04
60.96	1203.16	68.41	933.24
60.98	1200.58	68.44	933.43
61.01	1197.24	68.47	933.66
61.03	1194.83	68.5	933.92
61.06	1191.89	68.53	934.09
61.09	1188.83	68.56	934.37
61.11	1186.75	68.6	934.54
61.14	1183.75	68.63	934.86
61.16	1181.16	68.66	934.81
61.19	1178.85	68.69	935.08
61.22	1175.96	68.72	935.26
61.24	1173.38	68.75	935.42
61.27	1171.1	68.78	935.58
61.29	1168.44	68.81	935.74
61.32	1165.59	68.84	935.97
61.35	1163.02	68.87	936.11
61.37	1160.45	68.9	936.17
61.4	1157.75	68.93	936.46
61.42	1155.5	68.96	936.59
61.45	1152.79	68.99	936.72
61.48	1149.97	69.02	936.81
61.5	1147.47	69.05	936.98
61.53	1145.72	69.08	937.14
61.55	1143.09	69.11	937.3
61.58	1140.33	69.14	937.29
61.61	1138.29	69.17	937.46
61.63	1135.79	69.2	937.66
61.66	1133.31	69.23	937.67
61.68	1131.24	69.26	937.79
61.71	1128.82	69.29	937.99
61.74	1126.32	69.32	938.1
61.76	1124.29	69.35	938.21
61.79	1122.32	69.38	938.39
61.82	1119.82	69.42	938.36
61.84	1117.94	69.45	938.37
61.87	1115.39	69.48	938.53
61.89	1113.27	69.51	938.44
61.92	1111.28	69.54	938.59
61.95	1108.88	69.57	938.79
61.97	1106.81	69.6	938.84
62	1105	69.63	939.01
62.02	1102.87	69.66	938.96
62.05	1100.73	69.69	938.94
62.08	1098.7	69.72	939.15
62.1	1096.43	69.75	939.18
62.13	1094.34
62.15	1092.66
62.18	1090.56
62.21	1088.55
62.23	1086.74
62.26	1084.66
62.28	1082.55
62.31	1080.92
62.34	1079.01
62.36	1077.11
62.39	1075.59
62.41	1073.68
62.44	1071.7
62.47	1069.99
62.49	1068.05
62.52	1066.22
62.54	1064.61
62.57	1063.32
62.6	1061.23
62.62	1059.65
62.65	1058.35
62.67	1056.76
62.7	1055.15
62.73	1053.89
62.75	1052.39
62.78	1050.77
62.8	1049.41
62.83	1048
62.86	1046.34
62.88	1045.05
62.91	1043.62
62.93	1042.33
62.96	1041.28
62.99	1039.92
63.01	1038.33
63.04	1037.4
