# Supplementary material for: Guanidine hydrochloride reactivates an ancient septin hetero-oligomer assembly pathway in budding yeast
Source: eLife. 2020 Jan 28;9:e54355. doi: 10.7554/eLife.54355 (PMC7056273; doi:10.7554/eLife.54355)
Supplement: Figure 3—source data 2. [file elife-54355-fig3-data2.xlsx]

## Sheet: Figure 3C
	no GdnHCl	with GdnHCl	no GdnHCl	with GdnHCl
Number of subunits in particle	Number of particles		Proportion of particles
2	1690	0	0.399244	0
3	2543	1248	0.600756	0.384355
4	0	1251	0	0.385279
5	0	573	0	0.176471
6	0	175	0	0.0538959
Total	4233	3247	1	1
