# Supplementary material for: Guanidine hydrochloride reactivates an ancient septin hetero-oligomer assembly pathway in budding yeast
Source: eLife. 2020 Jan 28;9:e54355. doi: 10.7554/eLife.54355 (PMC7056273; doi:10.7554/eLife.54355)
Supplement: Figure 8—figure supplement 2—source data 1. [file elife-54355-fig8-figsupp2-data1.xlsx]

## Sheet: Figure 8– figure supplement 2
cdc3(P127E D128S K181T T302R Q306D)	recode control	cdc3(T203R Q306D)	JTY5397 (CDC3+)
0.233612	0.149124	0.171986	0.206677
0.232031	0.209636	0.171168	0.2512
0.194161	0.166629	0.229397	0.155556
0.262625	0.145491	0.212535	0.246224
0.169966	0.135966	0.261439	0.238687
0.217233	0.196105	0.154886	0.276332
0.172616	0.176507	0.162579	0.205039
0.238639	0.183396	0.203638	0.235094
0.175254	0.196758	0.203986	0.213117
0.182171	0.213733	0.205851	0.210968
0.251149	0.176853	0.161264	0.243104
0.220747	0.164459	0.188084	0.227142
0.232183	0.208587	0.155139	0.251517
0.218968	0.298599	0.215044	0.225795
0.223261	0.256646	0.180841	0.217557
0.214433	0.284844	0.224154	0.226488
0.228251	0.198829	0.26742	0.214196
0.193651	0.314687	0.253788	0.187702
0.253412	0.238629	0.275079	0.239144
0.266491	0.216348	0.21242	0.203157
0.21966	0.217919	0.208942	0.265591
0.249371	0.27196	0.234686	0.283855
0.15095	0.215582	0.239676	0.192732
0.258992	0.283418	0.268041	0.30741
0.248578	0.218256	0.229711	0.182543
0.260085	0.244606	0.195272	0.188593
0.276435	0.357183	0.230938	0.480764
0.197488	0.306084	0.197741	0.255374
0.234375	0.324019	0.332088	0.197454
0.30041	0.226256	0.153188	0.157509
0.203719	0.295727	0.200471	0.179502
0.203579	0.237485	0.201394	0.209662
0.309343	0.240597	0.221694	0.315775
0.192013	0.263882	0.245968	0.195881
0.29343	0.183841	0.216686	0.297366
0.264829	0.239755	0.244848	0.180945
0.231847	0.169229	0.244109	0.155452
0.229219	0.21161	0.201724	0.18445
0.223652	0.172947	0.335873	0.159893
0.27505	0.203919	0.159104	0.269402
0.224546	0.195584	0.195193	0.309559
0.182513	0.244312	0.213852	0.239922
0.258689	0.161126	0.242008	0.221927
0.230375	0.102721	0.238487	0.183648
0.292695	0.179876	0.362239	0.156755
0.278473	0.17003	0.322469	0.187536
0.219928	0.288395	0.220531	0.171768
0.23815	0.263698	0.242176	0.126897
0.29307	0.185352	0.232827	0.131253
0.255443	0.229583	0.335484	0.206334
0.234292	0.281651	0.273327
	0.197138	0.20874
