# Supplementary material for: Guanidine hydrochloride reactivates an ancient septin hetero-oligomer assembly pathway in budding yeast
Source: eLife. 2020 Jan 28;9:e54355. doi: 10.7554/eLife.54355 (PMC7056273; doi:10.7554/eLife.54355)
Supplement: Figure 8—source data 1. [file elife-54355-fig8-data1.xlsx]

## Sheet: Figure 8A
no GdnHCl	+ GdnHCl
130	66.1
121.6	16.3
96.7	64.5
145.1	64.9
87.2	54.9
74	60.7
100.2	48.8
69	38.6
104.1	38.3
91	25.6
144	47.9
148.3	24.2
54.6	23.7
109	32.2
93.3	94.1
63.4	51.7
51	60.1
31	46.9
54	96.2
34	43.9
