# Supplementary material for: Guanidine hydrochloride reactivates an ancient septin hetero-oligomer assembly pathway in budding yeast
Source: eLife. 2020 Jan 28;9:e54355. doi: 10.7554/eLife.54355 (PMC7056273; doi:10.7554/eLife.54355)
Supplement: Figure 8—source data 2. [file elife-54355-fig8-data2.xlsx]

## Sheet: Figure 8B
Y0342	Y0343	Y0350
0.878788	0.489876	0.627339
0.537634	0.33119	0.522312
0.768748	0.325282	1.2228
1.39633	0.520952	0.569413
0.962112	0.514456	0.654994
0.856805	0.420316	0.743075
1.16362	0.63035	0.635293
1.38951	0.29897	0.804052
0.883847	0.343978	0.703412
0.612644	0.592174	0.573433
1.13746	0.517572	0.662567
0.803526	0.413414	0.534557
1.33289	0.263786	0.750014
0.708589	0.277612	0.661083
1.23728	0.418093	1.21646
1.38419	0.374543	0.928144
0.963561	0.45	0.922131
1.13853	0.494572	0.585366
0.453237	0.359828	0.704966
0.654696	0.261157	0.740841
1.65909	0.363544	0.616162
1.49794	0.456549	0.673558
1.55657	0.321591	0.669694
1.64451	0.440486	0.659827
1.11663	0.477628	0.717847
1.04242	0.610092	0.582409
1.12425	0.226922	0.52724
1.02559	0.255967	0.840489
1.3946	0.43275	0.649623
0.580246	0.343902	0.654908
0.940231	0.340314	0.858299
0.997402	0.492207	0.55977
0.614743	0.195017	0.794069
0.612326	0.345078	0.65149
0.85565	0.317191	0.628902
1.10674	0.580415	0.74331
0.764706	0.615018	0.655597
1.32509	0.476081	0.683292
0.878228	0.687991	0.636168
0.724318	0.52443	0.659865
0.971154	0.37143	0.767379
0.447377	0.392689	0.619592
1.16475	0.622439	0.779559
0.892377	0.519693	0.687017
0.831463	0.42612	0.622322
0.786166	0.362619	0.625
1.18919	0.165289	0.821184
1.17928	0.184596	0.54103
1.22375	0.506528	0.615969
0.555065	0.732951	0.923966
0.436242	0.346679	0.734524
